# Supplementary material
Source: Research Square preprint supplement (doi:10.21203/rs.3.rs-8843307/v1)
Supplement: Supplementary file 1 [file 1eb9ba8be270de68c0f5ebf6.xlsx]

## Sheet: Sheet1
variant_id	AC_P_oncog	AF_P_oncog	AN_P_oncog	HomoC_P_oncog	SYMBOL	VARIANT_CLASS	Genomic_region	Feature	Consequence	INTRON	EXON	HGVSc	HGVSp	CLNSIG
chr11_108227806_C_T	1	5e-05	20182	0	ATM	SNV	EXONIC	NM_000051.4	stop_gained		3/63	NM_000051.4:c.103C>T	NP_000042.3:p.Arg35Ter	Pathogenic/Likely_pathogenic
chr11_108227875_G_T	1	5e-05	20154	0	ATM	SNV	EXONIC	NM_000051.4	missense_variant		3/63	NM_000051.4:c.172G>T	NP_000042.3:p.Asp58Tyr	Conflicting_classifications_of_pathogenicity
chr11_108244089_CT_C	2	0.0001	20690	0	ATM	deletion	EXONIC	NM_000051.4	frameshift_variant		6/63	NM_000051.4:c.640del	NP_000042.3:p.Ser214ProfsTer16	Pathogenic/Likely_pathogenic
chr11_108244839_CT_C	1	5e-05	20486	0	ATM	deletion	EXONIC	NM_000051.4	frameshift_variant		7/63	NM_000051.4:c.716del	NP_000042.3:p.Phe239SerfsTer16	Pathogenic
chr11_108244927_C_T	2	0.0001	20468	0	ATM	SNV	EXONIC	NM_000051.4	stop_gained		7/63	NM_000051.4:c.802C>T	NP_000042.3:p.Gln268Ter	Pathogenic/Likely_pathogenic
chr11_108250698_TA_T	1	5e-05	20946	0	ATM	deletion	SPLICING	NM_000051.4	splice_acceptor_variant	9/62		NM_000051.4:c.1236-2del		Likely_pathogenic
chr11_108250699_A_G	1	5e-05	20936	0	ATM	SNV	SPLICING	NM_000051.4	splice_acceptor_variant	9/62		NM_000051.4:c.1236-2A>G		Pathogenic/Likely_pathogenic
chr11_108250699_A_T	3	0.00014	20936	0	ATM	SNV	SPLICING	NM_000051.4	splice_acceptor_variant	9/62		NM_000051.4:c.1236-2A>T		Pathogenic/Likely_pathogenic
chr11_108250705_C_T	1	5e-05	20974	0	ATM	SNV	EXONIC	NM_000051.4	stop_gained		10/63	NM_000051.4:c.1240C>T	NP_000042.3:p.Gln414Ter	Pathogenic
chr11_108250866_CAA_C	1	5e-05	21042	0	ATM	deletion	EXONIC	NM_000051.4	frameshift_variant		10/63	NM_000051.4:c.1402_1403del	NP_000042.3:p.Lys468GlufsTer18	Pathogenic/Likely_pathogenic
chr11_108257606_G_A	1	5e-05	21304	0	ATM	SNV	SPLICING	NM_000051.4	splice_region_variant,synonymous_variant		15/63	NM_000051.4:c.2376G>A	NP_000042.3:p.Lys792%3D	Conflicting_classifications_of_pathogenicity
chr11_108259022_C_T	1	5e-05	21350	0	ATM	SNV	EXONIC	NM_000051.4	stop_gained		16/63	NM_000051.4:c.2413C>T	NP_000042.3:p.Arg805Ter	Pathogenic
chr11_108268487_TTGTG_T	1	5e-05	20884	0	ATM	deletion	EXONIC	NM_000051.4	frameshift_variant		18/63	NM_000051.4:c.2720_2723del	NP_000042.3:p.Cys907Ter	Pathogenic
chr11_108271147_G_GT	1	5e-05	20388	0	ATM	insertion	SPLICING	NM_000051.4	splice_donor_variant	19/62		NM_000051.4:c.2921+2dup		Conflicting_classifications_of_pathogenicity
chr11_108279586_CTCAG_C	1	5e-05	20942	0	ATM	deletion	EXONIC	NM_000051.4	frameshift_variant		23/63	NM_000051.4:c.3381_3384del	NP_000042.3:p.Gln1128LysfsTer3	Pathogenic/Likely_pathogenic
chr11_108281026_AT_A	1	5e-05	21170	0	ATM	deletion	EXONIC	NM_000051.4	frameshift_variant		24/63	NM_000051.4:c.3435del	NP_000042.3:p.Asp1145GlufsTer11	Pathogenic/Likely_pathogenic
chr11_108282732_CT_C	1	5e-05	20946	0	ATM	deletion	EXONIC	NM_000051.4	frameshift_variant		25/63	NM_000051.4:c.3603del	NP_000042.3:p.Phe1201LeufsTer6	Pathogenic/Likely_pathogenic
chr11_108282837_CTTTTA_C	1	5e-05	20978	0	ATM	deletion	EXONIC	NM_000051.4	frameshift_variant		25/63	NM_000051.4:c.3712_3716del	NP_000042.3:p.Leu1238LysfsTer6	Pathogenic/Likely_pathogenic
chr11_108284226_G_C	1	5e-05	20824	0	ATM	SNV	SPLICING	NM_000051.4	splice_acceptor_variant	25/62		NM_000051.4:c.3747-1G>C		Pathogenic/Likely_pathogenic
chr11_108284280_AG_A	1	5e-05	20966	0	ATM	deletion	EXONIC	NM_000051.4	frameshift_variant		26/63	NM_000051.4:c.3802del	NP_000042.3:p.Val1268Ter	Pathogenic
chr11_108284370_A_AT	1	5e-05	20976	0	ATM	insertion	EXONIC	NM_000051.4	frameshift_variant		26/63	NM_000051.4:c.3894dup	NP_000042.3:p.Ala1299CysfsTer3	Pathogenic
chr11_108299773_C_T	1	5e-05	21178	0	ATM	SNV	EXONIC	NM_000051.4	stop_gained		34/63	NM_000051.4:c.5065C>T	NP_000042.3:p.Gln1689Ter	Pathogenic
chr11_108301658_C_T	1	5e-05	21054	0	ATM	SNV	EXONIC	NM_000051.4	stop_gained		35/63	NM_000051.4:c.5188C>T	NP_000042.3:p.Arg1730Ter	Pathogenic/Likely_pathogenic
chr11_108307914_C_T	1	5e-05	20608	0	ATM	SNV	EXONIC	NM_000051.4	stop_gained		38/63	NM_000051.4:c.5692C>T	NP_000042.3:p.Arg1898Ter	Pathogenic
chr11_108310305_C_T	1	5e-05	20702	0	ATM	SNV	EXONIC	NM_000051.4	stop_gained		39/63	NM_000051.4:c.5908C>T	NP_000042.3:p.Gln1970Ter	Pathogenic
chr11_108316015_C_T	1	5e-05	20992	0	ATM	SNV	EXONIC	NM_000051.4	stop_gained		42/63	NM_000051.4:c.6100C>T	NP_000042.3:p.Arg2034Ter	Pathogenic/Likely_pathogenic
chr11_108316030_G_A	1	5e-05	21016	0	ATM	SNV	EXONIC	NM_000051.4	missense_variant		42/63	NM_000051.4:c.6115G>A	NP_000042.3:p.Glu2039Lys	Pathogenic/Likely_pathogenic
chr11_108317377_T_C	2	0.0001	20886	0	ATM	SNV	EXONIC	NM_000051.4	missense_variant		43/63	NM_000051.4:c.6203T>C	NP_000042.3:p.Leu2068Ser	Conflicting_classifications_of_pathogenicity
chr11_108317463_G_T	2	0.0001	20888	0	ATM	SNV	EXONIC	NM_000051.4	stop_gained		43/63	NM_000051.4:c.6289G>T	NP_000042.3:p.Glu2097Ter	Pathogenic/Likely_pathogenic
chr11_108330233_C_T	1	5e-05	20836	0	ATM	SNV	EXONIC	NM_000051.4	stop_gained		50/63	NM_000051.4:c.7327C>T	NP_000042.3:p.Arg2443Ter	Pathogenic/Likely_pathogenic
chr11_108331957_G_T	1	5e-05	21228	0	ATM	SNV	EXONIC	NM_000051.4	stop_gained		52/63	NM_000051.4:c.7708G>T	NP_000042.3:p.Glu2570Ter	Pathogenic/Likely_pathogenic
chr11_108332038_G_C	2	9e-05	21244	0	ATM	SNV	SPLICING	NM_000051.4	splice_donor_variant	52/62		NM_000051.4:c.7788+1G>C		Pathogenic/Likely_pathogenic
chr11_108332761_G_A	1	5e-05	21184	0	ATM	SNV	SPLICING	NM_000051.4	splice_acceptor_variant	52/62		NM_000051.4:c.7789-1G>A		Likely_pathogenic
chr11_108335109_G_A	1	5e-05	21050	0	ATM	SNV	SPLICING	NM_000051.4	splice_region_variant,synonymous_variant		55/63	NM_000051.4:c.8151G>A	NP_000042.3:p.Lys2717%3D	Conflicting_classifications_of_pathogenicity
chr11_108335941_TTAAC_T	1	5e-05	21056	0	ATM	deletion	EXONIC	NM_000051.4	frameshift_variant		56/63	NM_000051.4:c.8251_8254del	NP_000042.3:p.Thr2751SerfsTer54	Pathogenic
chr11_108335956_TATAAG_T	4	0.00019	21046	0	ATM	deletion	SPLICING	NM_000051.4	frameshift_variant,splice_region_variant		56/63	NM_000051.4:c.8264_8268del	NP_000042.3:p.Tyr2755CysfsTer12	Pathogenic
chr11_108343230_CCT_C	1	5e-05	21182	0	ATM	deletion	EXONIC	NM_000051.4	frameshift_variant		57/63	NM_000051.4:c.8283_8284del	NP_000042.3:p.Gln2762AlafsTer6	Pathogenic
chr11_108365102_CTT_C	3	0.00015	20682	0	ATM	deletion	EXONIC	NM_000051.4	frameshift_variant		62/63	NM_000051.4:c.8873_8874del	NP_000042.3:p.Phe2958Ter	Pathogenic
chr11_108365343_CAACAAAGTAGCTGAACGTGTCTTAATGA_C	2	0.0001	20714	0	ATM	deletion	EXONIC	NM_000051.4	frameshift_variant		63/63	NM_000051.4:c.9007_9034del	NP_000042.3:p.Asn3003AspfsTer6	Pathogenic/Likely_pathogenic
chr11_108365415_C_CA	1	5e-05	20730	0	ATM	insertion	EXONIC	NM_000051.4	frameshift_variant		63/63	NM_000051.4:c.9079dup	NP_000042.3:p.Ser3027LysfsTer36	Pathogenic/Likely_pathogenic
chr13_32319268_ACT_A	2	0.0001	20196	0	BRCA2	deletion	EXONIC	NM_000059.4	frameshift_variant		3/27	NM_000059.4:c.262_263del	NP_000050.3:p.Leu88AlafsTer12	Pathogenic
chr13_32325184_G_A	1	5e-05	20262	0	BRCA2	SNV	SPLICING	NM_000059.4	missense_variant,splice_region_variant		4/27	NM_000059.4:c.425G>A	NP_000050.3:p.Ser142Asn	Conflicting_classifications_of_pathogenicity
chr13_32325184_G_T	1	5e-05	20262	0	BRCA2	SNV	SPLICING	NM_000059.4	missense_variant,splice_region_variant		4/27	NM_000059.4:c.425G>T	NP_000050.3:p.Ser142Ile	Conflicting_classifications_of_pathogenicity
chr13_32332663_G_A	1	5e-05	21082	0	BRCA2	SNV	EXONIC	NM_000059.4	stop_gained		10/27	NM_000059.4:c.1185G>A	NP_000050.3:p.Trp395Ter	Pathogenic
chr13_32336450_C_T	1	5e-05	20986	0	BRCA2	SNV	EXONIC	NM_000059.4	stop_gained		11/27	NM_000059.4:c.2095C>T	NP_000050.3:p.Gln699Ter	Pathogenic
chr13_32337055_TC_T	2	0.0001	20922	0	BRCA2	deletion	EXONIC	NM_000059.4	frameshift_variant		11/27	NM_000059.4:c.2701del	NP_000050.3:p.Ala902LeufsTer2	Pathogenic
chr13_32337160_TAAAC_T	3	0.00014	20984	0	BRCA2	deletion	EXONIC	NM_000059.4	frameshift_variant		11/27	NM_000059.4:c.2808_2811del	NP_000050.3:p.Ala938ProfsTer21	Pathogenic
chr13_32337185_A_T	0	0	20988	0	BRCA2	SNV	EXONIC	NM_000059.4	stop_gained		11/27	NM_000059.4:c.2830A>T	NP_000050.3:p.Lys944Ter	Pathogenic
chr13_32337810_T_G	1	5e-05	21186	0	BRCA2	SNV	EXONIC	NM_000059.4	stop_gained		11/27	NM_000059.4:c.3455T>G	NP_000050.3:p.Leu1152Ter	Pathogenic
chr13_32338034_CTG_C	2	9e-05	21200	0	BRCA2	deletion	EXONIC	NM_000059.4	frameshift_variant		11/27	NM_000059.4:c.3680_3681del	NP_000050.3:p.Leu1227GlnfsTer5	Pathogenic
chr13_32338200_CTG_C	1	5e-05	21142	0	BRCA2	deletion	EXONIC	NM_000059.4	frameshift_variant		11/27	NM_000059.4:c.3847_3848del	NP_000050.3:p.Val1283LysfsTer2	Pathogenic
chr13_32338208_GA_G	1	5e-05	21144	0	BRCA2	deletion	EXONIC	NM_000059.4	frameshift_variant		11/27	NM_000059.4:c.3860del	NP_000050.3:p.Asn1287IlefsTer6	Pathogenic
chr13_32338277_G_T	1	5e-05	21186	0	BRCA2	SNV	EXONIC	NM_000059.4	stop_gained		11/27	NM_000059.4:c.3922G>T	NP_000050.3:p.Glu1308Ter	Pathogenic
chr13_32339158_TA_T	1	5e-05	21370	0	BRCA2	deletion	EXONIC	NM_000059.4	frameshift_variant		11/27	NM_000059.4:c.4808del	NP_000050.3:p.Asn1603ThrfsTer14	Pathogenic
chr13_32339287_AAAAG_A	1	5e-05	21366	0	BRCA2	deletion	EXONIC	NM_000059.4	frameshift_variant		11/27	NM_000059.4:c.4936_4939del	NP_000050.3:p.Glu1646GlnfsTer23	Pathogenic
chr13_32339318_T_TA	1	5e-05	21358	0	BRCA2	insertion	EXONIC	NM_000059.4	stop_gained,frameshift_variant		11/27	NM_000059.4:c.4964dup	NP_000050.3:p.Tyr1655Ter	Pathogenic
chr13_32339320_C_A	1	5e-05	21368	0	BRCA2	SNV	EXONIC	NM_000059.4	stop_gained		11/27	NM_000059.4:c.4965C>A	NP_000050.3:p.Tyr1655Ter	Pathogenic
chr13_32339482_TTATG_T	1	5e-05	21316	0	BRCA2	deletion	EXONIC	NM_000059.4	frameshift_variant		11/27	NM_000059.4:c.5130_5133del	NP_000050.3:p.Tyr1710Ter	Pathogenic
chr13_32339565_ATACT_A	1	5e-05	21270	0	BRCA2	deletion	EXONIC	NM_000059.4	frameshift_variant		11/27	NM_000059.4:c.5213_5216del	NP_000050.3:p.Thr1738IlefsTer2	Pathogenic
chr13_32339947_CAT_C	1	5e-05	21302	0	BRCA2	deletion	EXONIC	NM_000059.4	frameshift_variant		11/27	NM_000059.4:c.5595_5596del	NP_000050.3:p.Phe1866TyrfsTer6	Pathogenic
chr13_32340000_C_A	1	5e-05	21326	0	BRCA2	SNV	EXONIC	NM_000059.4	stop_gained		11/27	NM_000059.4:c.5645C>A	NP_000050.3:p.Ser1882Ter	Pathogenic
chr13_32340072_ACTCT_A	1	5e-05	21350	0	BRCA2	deletion	EXONIC	NM_000059.4	frameshift_variant		11/27	NM_000059.4:c.5720_5723del	NP_000050.3:p.Ser1907Ter	Pathogenic
chr13_32340561_TAGAA_T	1	5e-05	21366	0	BRCA2	deletion	EXONIC	NM_000059.4	frameshift_variant		11/27	NM_000059.4:c.6209_6212del	NP_000050.3:p.Glu2070ValfsTer10	Pathogenic
chr13_32340629_CTT_C	3	0.00014	21384	0	BRCA2	deletion	EXONIC	NM_000059.4	frameshift_variant		11/27	NM_000059.4:c.6275_6276del	NP_000050.3:p.Leu2092ProfsTer7	Pathogenic
chr13_32340795_ACT_A	1	5e-05	21378	0	BRCA2	deletion	EXONIC	NM_000059.4	frameshift_variant		11/27	NM_000059.4:c.6443_6444del	NP_000050.3:p.Ser2148TyrfsTer2	Pathogenic
chr13_32340836_GACAA_G	1	5e-05	21372	0	BRCA2	deletion	EXONIC	NM_000059.4	frameshift_variant		11/27	NM_000059.4:c.6486_6489del	NP_000050.3:p.Lys2162AsnfsTer5	Pathogenic
chr13_32340842_C_T	1	5e-05	21382	0	BRCA2	SNV	EXONIC	NM_000059.4	stop_gained		11/27	NM_000059.4:c.6487C>T	NP_000050.3:p.Gln2163Ter	Pathogenic
chr13_32346848_T_A	1	5e-05	21656	0	BRCA2	SNV	EXONIC	NM_000059.4	stop_gained		13/27	NM_000059.4:c.6959T>A	NP_000050.3:p.Leu2320Ter	Pathogenic
chr13_32357920_A_G	1	5e-05	20728	0	BRCA2	SNV	EXONIC	NM_000059.4	missense_variant		16/27	NM_000059.4:c.7796A>G	NP_000050.3:p.Glu2599Gly	Conflicting_classifications_of_pathogenicity
chr13_32363379_A_G	1	5e-05	20876	0	BRCA2	SNV	EXONIC	NM_000059.4	missense_variant		18/27	NM_000059.4:c.8177A>G	NP_000050.3:p.Tyr2726Cys	Pathogenic/Likely_pathogenic
chr13_32379814_C_A	1	5e-05	20644	0	BRCA2	SNV	EXONIC	NM_000059.4	stop_gained		23/27	NM_000059.4:c.9018C>A	NP_000050.3:p.Tyr3006Ter	Pathogenic
chr13_32379820_TTATCA_T	2	0.0001	20656	0	BRCA2	deletion	EXONIC	NM_000059.4	frameshift_variant		23/27	NM_000059.4:c.9026_9030del	NP_000050.3:p.Tyr3009SerfsTer7	Pathogenic
chr13_32394814_C_T	1	5e-05	21004	0	BRCA2	SNV	EXONIC	NM_000059.4	stop_gained		25/27	NM_000059.4:c.9382C>T	NP_000050.3:p.Arg3128Ter	Pathogenic
chr13_32397012_C_T	1	5e-05	20622	0	BRCA2	SNV	EXONIC	NM_000059.4	stop_gained		26/27	NM_000059.4:c.9616C>T	NP_000050.3:p.Gln3206Ter	Pathogenic
chr13_32398437_C_G	1	5e-05	20328	0	BRCA2	SNV	EXONIC	NM_000059.4	stop_gained		27/27	NM_000059.4:c.9924C>G	NP_000050.3:p.Tyr3308Ter	Pathogenic
chr16_23623000_CT_C	1	5e-05	20390	0	PALB2	deletion	EXONIC	NM_024675.4	frameshift_variant		9/13	NM_024675.4:c.2964del	NP_078951.2:p.Val989Ter	Pathogenic
chr16_23623094_CT_C	1	5e-05	20378	0	PALB2	deletion	EXONIC	NM_024675.4	frameshift_variant		9/13	NM_024675.4:c.2870del	NP_078951.2:p.Lys957SerfsTer5	Pathogenic
chr16_23626352_C_A	1	5e-05	20432	0	PALB2	SNV	EXONIC	NM_024675.4	stop_gained		7/13	NM_024675.4:c.2632G>T	NP_078951.2:p.Glu878Ter	Pathogenic
chr16_23629897_G_A	1	5e-05	20914	0	PALB2	SNV	EXONIC	NM_024675.4	stop_gained		5/13	NM_024675.4:c.2257C>T	NP_078951.2:p.Arg753Ter	Pathogenic
chr16_23634871_G_A	2	9e-05	21074	0	PALB2	SNV	EXONIC	NM_024675.4	stop_gained		4/13	NM_024675.4:c.1675C>T	NP_078951.2:p.Gln559Ter	Pathogenic
chr16_23635306_G_A	2	0.0001	21024	0	PALB2	SNV	EXONIC	NM_024675.4	stop_gained		4/13	NM_024675.4:c.1240C>T	NP_078951.2:p.Arg414Ter	Pathogenic
chr16_23635569_G_GA	2	0.0001	20976	0	PALB2	insertion	EXONIC	NM_024675.4	frameshift_variant		4/13	NM_024675.4:c.976dup	NP_078951.2:p.Ser326PhefsTer6	Pathogenic
chr16_23635894_C_A	1	5e-05	20900	0	PALB2	SNV	EXONIC	NM_024675.4	stop_gained		4/13	NM_024675.4:c.652G>T	NP_078951.2:p.Glu218Ter	Pathogenic
chr17_7673802_C_T	1	5e-05	20214	0	TP53	SNV	EXONIC	NM_000546.6	missense_variant		8/11	NM_000546.6:c.818G>A	NP_000537.3:p.Arg273His	Pathogenic
chr17_7674239_AG_A	1	5e-05	20240	0	TP53	deletion	EXONIC	NM_000546.6	frameshift_variant		7/11	NM_000546.6:c.723del	NP_000537.3:p.Cys242AlafsTer5	Pathogenic
chr17_7675139_C_T	2	0.0001	20446	0	TP53	SNV	EXONIC	NM_000546.6	missense_variant		5/11	NM_000546.6:c.473G>A	NP_000537.3:p.Arg158His	Pathogenic/Likely_pathogenic
chr17_7675995_G_A	1	5e-05	20792	0	TP53	SNV	SPLICING	NM_000546.6	missense_variant,splice_region_variant		4/11	NM_000546.6:c.374C>T	NP_000537.3:p.Thr125Met	Conflicting_classifications_of_pathogenicity
chr2_47783495_T_G	2	9e-05	21380	0	MSH6	SNV	SPLICING	NM_000179.3	splice_donor_variant	1/9		NM_000179.3:c.260+2T>G		Likely_pathogenic
chr2_47798725_C_T	1	5e-05	21886	0	MSH6	SNV	EXONIC	NM_000179.3	stop_gained		4/10	NM_000179.3:c.742C>T	NP_000170.1:p.Arg248Ter	Pathogenic
chr2_47799150_CG_C	1	5e-05	21882	0	MSH6	deletion	EXONIC	NM_000179.3	frameshift_variant		4/10	NM_000179.3:c.1168del	NP_000170.1:p.Asp390IlefsTer21	Pathogenic
chr2_47799737_T_C	1	5e-05	21886	0	MSH6	SNV	EXONIC	NM_000179.3	missense_variant		4/10	NM_000179.3:c.1754T>C	NP_000170.1:p.Leu585Pro	Conflicting_classifications_of_pathogenicity
chr2_47799788_C_G	1	5e-05	21886	0	MSH6	SNV	EXONIC	NM_000179.3	stop_gained		4/10	NM_000179.3:c.1805C>G	NP_000170.1:p.Ser602Ter	Pathogenic
chr2_47800168_GCCTATCAA_G	1	5e-05	21884	0	MSH6	deletion	EXONIC	NM_000179.3	frameshift_variant		4/10	NM_000179.3:c.2187_2194del	NP_000170.1:p.Tyr730AsnfsTer23	Pathogenic
chr2_47801001_C_G	1	5e-05	21460	0	MSH6	SNV	EXONIC	NM_000179.3	stop_gained		4/10	NM_000179.3:c.3018C>G	NP_000170.1:p.Tyr1006Ter	Pathogenic
chr2_47803473_C_T	1	5e-05	21866	0	MSH6	SNV	EXONIC	NM_000179.3	missense_variant		5/10	NM_000179.3:c.3226C>T	NP_000170.1:p.Arg1076Cys	Likely_pathogenic
chr2_47803500_A_AC	1	5e-05	21876	0	MSH6	insertion	EXONIC	NM_000179.3	frameshift_variant		5/10	NM_000179.3:c.3261dup	NP_000170.1:p.Phe1088LeufsTer5	Pathogenic
chr2_47803500_AC_A	1	5e-05	21876	0	MSH6	deletion	EXONIC	NM_000179.3	frameshift_variant		5/10	NM_000179.3:c.3261del	NP_000170.1:p.Phe1088SerfsTer2	Pathogenic
chr2_47803622_CA_C	1	5e-05	21872	0	MSH6	deletion	EXONIC	NM_000179.3	frameshift_variant		5/10	NM_000179.3:c.3378del	NP_000170.1:p.Ala1127ProfsTer18	Pathogenic
chr2_47805638_G_A	1	5e-05	21868	0	MSH6	SNV	EXONIC	NM_000179.3	missense_variant		7/10	NM_000179.3:c.3577G>A	NP_000170.1:p.Glu1193Lys	Pathogenic/Likely_pathogenic
chr2_47806282_G_A	1	5e-05	21884	0	MSH6	SNV	EXONIC	NM_000179.3	missense_variant		8/10	NM_000179.3:c.3725G>A	NP_000170.1:p.Arg1242His	Pathogenic/Likely_pathogenic
chr2_47806282_G_T	1	5e-05	21884	0	MSH6	SNV	EXONIC	NM_000179.3	missense_variant		8/10	NM_000179.3:c.3725G>T	NP_000170.1:p.Arg1242Leu	Conflicting_classifications_of_pathogenicity
chr22_28694066_G_A	14	0.0007	20122	0	CHEK2	SNV	EXONIC	NM_007194.4	missense_variant		13/15	NM_007194.4:c.1427C>T	NP_009125.1:p.Thr476Met	Conflicting_classifications_of_pathogenicity
chr22_28695250_T_C	1	5e-05	20468	0	CHEK2	SNV	SPLICING	NM_007194.4	splice_region_variant,splice_polypyrimidine_tract_variant,intron_variant	11/14		NM_007194.4:c.1260-8A>G		Conflicting_classifications_of_pathogenicity
chr22_28695709_C_G	1	5e-05	20642	0	CHEK2	SNV	SPLICING	NM_007194.4	splice_donor_variant	11/14		NM_007194.4:c.1259+1G>C		Pathogenic/Likely_pathogenic
chr22_28695735_TCCAGCAGTCCACAGCACGGTTATAC_T	1	5e-05	20642	0	CHEK2	deletion	EXONIC	NM_007194.4	frameshift_variant		11/15	NM_007194.4:c.1209_1233del	NP_009125.1:p.Tyr404ValfsTer2	Pathogenic/Likely_pathogenic
chr22_28695737_C_T	1	5e-05	20656	0	CHEK2	SNV	EXONIC	NM_007194.4	stop_gained		11/15	NM_007194.4:c.1232G>A	NP_009125.1:p.Trp411Ter	Pathogenic/Likely_pathogenic
chr22_28695868_AG_A	5	0.00024	20698	0	CHEK2	deletion	EXONIC	NM_007194.4	frameshift_variant		11/15	NM_007194.4:c.1100del	NP_009125.1:p.Thr367MetfsTer15	Pathogenic
chr22_28696957_C_T	1	5e-05	20846	0	CHEK2	SNV	EXONIC	NM_007194.4	missense_variant		10/15	NM_007194.4:c.1039G>A	NP_009125.1:p.Asp347Asn	Conflicting_classifications_of_pathogenicity
chr22_28703515_CAATAT_C	1	5e-05	20872	0	CHEK2	deletion	EXONIC	NM_007194.4	frameshift_variant		8/15	NM_007194.4:c.893_897del	NP_009125.1:p.Tyr298CysfsTer12	Pathogenic
chr22_28703536_CA_C	1	5e-05	20868	0	CHEK2	deletion	EXONIC	NM_007194.4	frameshift_variant		8/15	NM_007194.4:c.876del	NP_009125.1:p.Phe292LeufsTer12	Pathogenic
chr22_28719486_C_A	1	5e-05	19850	0	CHEK2	SNV	SPLICING	NM_007194.4	splice_acceptor_variant	4/14		NM_007194.4:c.593-1G>T		Pathogenic/Likely_pathogenic
chr22_28724977_CT_C	3	0.00015	20586	0	CHEK2	deletion	SPLICING	NM_007194.4	frameshift_variant,splice_region_variant		4/15	NM_007194.4:c.591del	NP_009125.1:p.Val198PhefsTer7	Pathogenic/Likely_pathogenic
chr22_28725099_A_G	16	0.00078	20588	0	CHEK2	SNV	EXONIC	NM_007194.4	missense_variant		4/15	NM_007194.4:c.470T>C	NP_009125.1:p.Ile157Thr	Conflicting_classifications_of_pathogenicity|risk_factor
chr22_28725242_C_T	1	5e-05	20596	0	CHEK2	SNV	SPLICING	NM_007194.4	splice_donor_variant	3/14		NM_007194.4:c.444+1G>A		Pathogenic/Likely_pathogenic
chr22_28725278_G_A	1	5e-05	20588	0	CHEK2	SNV	EXONIC	NM_007194.4	stop_gained		3/15	NM_007194.4:c.409C>T	NP_009125.1:p.Arg137Ter	Pathogenic
chr22_28725338_T_C	11	0.00053	20578	0	CHEK2	SNV	EXONIC	NM_007194.4	missense_variant		3/15	NM_007194.4:c.349A>G	NP_009125.1:p.Arg117Gly	Pathogenic/Likely_pathogenic
