# Supplementary material
Source: Research Square preprint supplement (doi:10.21203/rs.3.rs-8843307/v1)
Supplement: Supplementary file 2 [file 23ed1fecbc706d445b34b0ec.xlsx]

## Sheet: VUS
Gene	Transcript (RefSeq)	Genomic Description	Exon / Intron	cDNA change	Protein change
ATM	NM_000051.4	g.108250981 G>T	10	c.1516G>T	p.(Gly506Cys)
ATM	NM_000051.4	g.108253966 A>G	13	c.2051A>G	p.(Gln684Arg)
ATM	NM_000051.4	g.108272578 C>A	21	c.3124C>A	p.(Leu1042Ile)
ATM	NM_000051.4	g.108289068 T>A	28	c.4201T>A	p.(Leu1401Ile)
ATM	NM_000051.4	g.108289644 G>A	29	c.4279G>A	p.(Ala1427Thr)
ATM	NM_000051.4	g.108295006 G>A	32	c.4856G>A	p.(Arg1619Lys)
ATM	NM_000051.4	g.108304823 G>C	37	c.5645G>C	p.(Arg1882Pro)
ATM	NM_000051.4	g.108317498 G>T	43	c.6324G>T	p.(Gln2108His)
ATM	NM_000051.4	g.108326224 C>T	47	c.6974C>T	p.(Ala2325Val)
ATM	NM_000051.4	g.108329066 C>G	49	c.7135C>G	p.(Leu2379Val)
ATM	NM_000051.4	g.108332809 G>C	53	c.7836G>C	p.(Arg2612Ser)
BRCA2	NM_000059.4	g.32316489 C>A	2	c.29C>A	p.(Thr10Lys)
BRCA2	NM_000059.4	g.32326257 T>G	6	c.491T>G	p.(Leu164Trp)
BRCA2	NM_000059.4	g.32330989 C>G	9	c.752C>G	p.(Thr251Arg)
BRCA2	NM_000059.4	g.32339508 A>G	11	c.5153A>G	p.(Asn171Ser)
BRCA2	NM_000059.4	g.32346895 C>T	13	c.7006C>T	p.(Arg2336Cys)
CHEK2	NM_007194.4	g.28725028 G>A	4	c.541C>T	p.(Arg181Cys)
CHEK2	NM_007194.4	g.28725012 T>C	4	c.557A>G	p.(Asn186Ser)
CHEK2	NM_007194.4	g.28724991 A>G	4	c.578T>C	p.(Leu193Pro)
CHEK2	NM_007194.4	g.28699866 T>C	9	c.980A>G	p.(Tyr327Cys)
CHEK2	NM_007194.4	g.28699838 C>T	9	c.1008G>A	p.(Gln336=)
CHEK2	NM_007194.4	g.28687911 C>T	15	c.1618G>A	p.(Ala540Thr)
CHEK2	NM_007194.4	g.28694130 T>C	Intron 12	c.1376-13A>G	—
EPCAM	NM_002354.3	g.47373967 T>A	3	c.344T>A	p.(Met115Lys)
EPCAM	NM_002354.3	g.47373967 T>A	3	c.344T>A	p.(Met115Lys)
MLH1	NM_000249.4	g.37028840 A>C	13	c.1466A>C	p.(Glu489Ala)
MLH1	NM_000249.4	g.37014429 T>C	Intron 8	c.678-3T>C	—
MSH6	NM_000179.3	g.47783436 A>G	1	c.203A>G	p.(Lys68Arg)
MSH6	NM_000179.3	g.47798828 T>C	4	c.845T>C	p.(Val282Ala)
MSH6	NM_000179.3	g.47799796 A>G	4	c.1813A>G	p.(Thr605Ala)
MSH6	NM_000179.3	g.47800882 A>G	—	c.2899A>G	p.(Ile967Val)
PALB2	NM_024675.4	g.23636317 A>G	4	c.229T>C	p.(Cys77Arg)
PALB2	NM_024675.4	g.23626337 T>C	7	c.2647A>G	p.(Lys883Glu)
PMS2	NM_000535.7	g.5999148 C>A	6	c.665G>T	p.(Ser222Ile)
PMS2	NM_000535.7	g.5989938 C>T	10	c.1006G>A	p.(Val336Ile)
PMS2	NM_000535.7	g.5987342 C>T	11	c.1423G>A	p.(Val475Met)
PMS2	NM_000535.7	g.5987189 C>A	11	c.1576G>T	p.(Asp526Tyr)
PMS2	NM_000535.7	g.5987625 G>C	Intron 10	c.1145-5C>G	—
POLD1	NM_002691.4	g.50399027 A>C	2	c.176A>C	p.(Gln59Pro)
TP53	NM_000546.6	g.7675145 C>T	5	c.467G>A	p.(Arg156His)
