# Supplementary material
Source: Research Square preprint supplement (doi:10.21203/rs.3.rs-8843307/v1)
Supplement: Supplementary file 3 [file 35fec5cf464f8a4899146947.xlsx]

## Sheet: Sheet1
Gene	Cohort Frequency (%)	FJD Pseudo-controls Frequency (%)	OR (CI 95%) – p-value (Cohort vs FJD)	gnomAD 1 Frequency (%)	OR (CI 95%) – p-value (Cohort vs gnomAD 1)	gnomAD 2 Frequency (%)	OR (CI 95%) – p-value (Cohort vs gnomAD 2)	Gen	Group	Positive	Total	Frequency	Grupo	Positivos	Frecuencia
ATM_breast	2.7219	0.5252	5.30 (3.09 – 8.82), p=5.94e-09	0.3772	7.39 (4.34 – 12.17), p=1.03e-11	0.4672	5.96 (3.00 – 12.13), p=7.34e-08	Datos con OR finales
BRCA2_breast	4.6154	0.3965	12.15 (7.60 – 19.36), p=3.27e-23	0.304	15.85 (10.09 – 24.76), p=8.26e-28	0.2629	18.34 (8.69 – 43.22), p=4.77e-20	Datos con OR finales
BRCA2_ovary	1.6807	0.3965	4.29 (0.50 – 16.84), p=0.0856	0.304	5.60 (0.65 – 21.78), p=0.0538	0.2629	6.48 (0.67 – 31.80), p=0.0505	Datos con OR finales
BRCA2_breast_ovary	4.2531	0.3965	11.15 (7.03 – 17.67), p=7.30e-23	0.304	14.56 (9.34 – 22.59), p=1.22e-27	0.2629	16.84 (8.02 – 39.58), p=1.64e-19	Datos con OR finales
CHEK2_breast	0.5917	0.5729	1.03 (0.32 – 2.56), p=0.815	0.6267	0.94 (0.30 – 2.28), p=1.000	0.6713	0.88 (0.26 – 2.38), p=1.000	Datos con OR finales
PALB2_breast	0.7101	0.1052	6.79 (2.06 – 20.08), p=0.0010	0.2432	2.93 (1.01 – 6.99), p=0.0237	0.1752	4.07 (1.09 – 15.28), p=0.0183	Datos con OR finales
MSH6_colon	0.5747	0.128	4.51 (0.11 – 29.97), p=0.2109	0.0852	6.77 (0.16 – 44.99), p=0.1462	0.1752	3.29 (0.07 – 27.36), p=0.2934	Datos con OR finales
MSH6_endometrium	9.8361	0.128	84.56 (25.70 – 245.49), p=8.24e-10	0.0852	126.80 (38.62 – 371.47), p=7.42e-11	0.1752	61.61 (15.93 - 237.92) p=1.90e-08	Datos con OR finales
MSH6_colon_endometrium	2.9787	0.0492	62.18 (16.87 – 250.63), p=1.97e-09	0.0791	38.71 (12.95 – 105.38), p=6.73e-09	0.1168	26.16 (6.60 – 122.52), p=1.09e-06	Datos con OR finales
TP53_breast	0.3546	0.0492	7.23 (1.12 – 37.24), p=0.0189	0.0791	4.49 (0.82 – 16.39), p=0.0407	0.1168	3.04 (0.44 – 18.01), p=0.1447	Datos con OR finales
								ATM	Breast cancer	23	845	2.72189
								ATM	gnomAD European	62	16435	0.377244
								ATM	gnomAD European non finnish	16	3425	0.467153
								ATM	Pseudocontrols FJD	55	10473	0.52516
								BRCA2_mama	Breast cancer	39	845	4.61538
								BRCA2_mama	gnomAD European	50	16445	0.304044
								BRCA2_mama	gnomAD European non finnish	9	3423	0.262927
								BRCA2_mama	Pseudocontrols FJD	42	10593	0.396488
								BRCA2_ovario	Ovarian cancer	2	119	1.68067
								BRCA2_ovario	gnomAD European	50	16445	0.304044
								BRCA2_ovario	gnomAD European non finnish	9	3423	0.262927
								BRCA2_ovario	Pseudocontrols FJD	42	10593	0.396488
								BRCA2_mama_ovario	Breast + ovarian cancer	41	964	4.25311
								BRCA2_mama_ovario	gnomAD European	50	16445	0.304044
								BRCA2_mama_ovario	gnomAD European non finnish	9	3423	0.262927
								BRCA2_mama_ovario	Pseudocontrols FJD	42	10593	0.396488
								MSH6_colon	Colorrectal cancer	1	174	0.574713
								MSH6_colon	gnomAD European	14	16427	0.0852255
								MSH6_colon	gnomAD European non finnish	6	3424	0.175234
								MSH6_colon	Pseudocontrols FJD	14	10940	0.127971
								CHEK2	Breast cancer	5	845	0.591716
								CHEK2	gnomAD European	103	16436	0.626673
								CHEK2	gnomAD European non finnish	23	3426	0.671337
								CHEK2	Pseudocontrols FJD	59	10298	0.572927
								PALB2	Breast cancer	6	845	0.710059
								PALB2	gnomAD European	40	16444.5	0.243242
								PALB2	gnomAD European non finnish	6	3425.5	0.175157
								PALB2	Pseudocontrols FJD	11	10454	0.105223
								MSH6_endometrio	Endometrium cancer	6	61	9.83607
								MSH6_endometrio	gnomAD European	14	16427	0.0852255
								MSH6_endometrio	gnomAD European non finnish	6	3424	0.175234
								MSH6_endometrio	Pseudocontrols FJD	14	10940	0.127971
								MSH6_colon_endometrio	Colorrectal + endometrum cancer	7	235	2.97872
								MSH6_colon_endometrio	gnomAD European	13	16429	0.0791284
								MSH6_colon_endometrio	gnomAD European non finnish	4	3424	0.116822
								MSH6_colon_endometrio	Pseudocontrols FJD	5	10171.5	0.049157
								TP53			846		Breast cancer	3	0.35461
								TP53			16429		gnomAD European	13	0.0791284
								TP53			3424		gnomAD European non finnish	4	0.116822
								TP53			10171.5		Pseudocontrols FJD	5	0.049157
