# Supplementary material
Source: Research Square preprint supplement (doi:10.21203/rs.3.rs-8843307/v1)
Supplement: Supplementary file 4 [file 577fe30b2b83313f2e769ad7.docx]

Supplementary Table 4. Descriptive characteristics of the cohort

|  | **Total (n = 360)** | **Percentage (%)** |
| --- | --- | --- |
| **Personal history of other cancers** | 26 | 7.2 |
| **Family history of cancer** |  |  |
| FH PCa | 87 | 24.2 |
| FH HBOC | 67 | 18.6 |
| FH LS | 38 | 10.6 |
| FH others | 28 | 7.8 |
| FH HBOC and SL | 11 | 3.1 |
| No FH | 128 | 35.6 |
| Information not available | 1 | 0.3 |
| **Clinical risk at diagnosis** |  |  |
| Low | 95 | 26.4 |
| Intermediate | 94 | 26.1 |
| High | 72 | 20 |
| Metastasic | 93 | 25.8 |
| Information not available | 6 | 1.7 |

***FH PCa:*** *family history of prostate cancer only.* ***FH HBOC****: includes HBOC, as well as combinations with PCa and/or other cancers****. FH LS****: includes LS and combinations* *with PCa and/or other cancers.* ***FH others:*** *includes a history of other cancers not directly related to HBOC, or LS, as well as combinations with PCa.* ***FH HBOC and LS****: includes family combinations with HBOC and Lynch, with or without PCa or other cancers.*
