# Supplementary material
Source: Research Square preprint supplement (doi:10.21203/rs.3.rs-8843307/v1)
Supplement: Supplementary file 5 [file ced812e191ba127acbda43f8.xlsx]

## Sheet: Variants
gnomAD ID	RefSeq	Gene	gnomAD ID	Chromosome	Position	rsIDs	Reference	Alternate	HGVS Consequence	Protein Consequence	Transcript Consequence	VEP Annotation	ClinVar Germline Classification	ClinVar Variation ID	Flags	Allele Count	Allele Number	Allele Frequency	Homozygote Count	Hemizygote Count	Allele Count European (non-Finnish)	Allele Number European (non-Finnish)	Homozygote Count European (non-Finnish)	Hemizygote Count European (non-Finnish)
13-32316463-G-A	NM_000059.4	BRCA2	13-32316463-G-A	13	32316463	rs80358650	G	A	p.Met1?	p.Met1?	c.3G>A	start_lost	Pathogenic	51579		1	32894	3.04007e-05	0	0	1	6854	0	0
13-32316490-A-AT	NM_000059.4	BRCA2	13-32316490-A-AT	13	32316490	rs80359393	A	AT	p.Glu13Ter	p.Glu13Ter	c.36dup	frameshift_variant	Pathogenic	51509		1	32908	3.03877e-05	0	0	0	6850	0	0
13-32326099-A-G	NM_000059.4	BRCA2	13-32326099-A-G	13	32326099	rs398122779	A	G	c.426-2A>G		c.426-2A>G	splice_acceptor_variant	Pathogenic/Likely pathogenic	91817		1	32908	3.03877e-05	0	0	0	6850	0	0
13-32329440-C-G	NM_000059.4	BRCA2	13-32329440-C-G	13	32329440	rs568027879	C	G	c.632-3C>G		c.632-3C>G	splice_region_variant	Likely pathogenic	219896		1	32872	3.0421e-05	0	0	0	6846	0	0
13-32331003-ACAAAT-A	NM_000059.4	BRCA2	13-32331003-ACAAAT-A	13	32331003	rs80359671	ACAAAT	A	p.Asn257LysfsTer17	p.Asn257LysfsTer17	c.771_775del	frameshift_variant	Pathogenic	9326		1	32908	3.03877e-05	0	0	0	6854	0	0
13-32332673-AC-A	NM_000059.4	BRCA2	13-32332673-AC-A	13	32332673	rs869050242	AC	A	p.Leu400PhefsTer4	p.Leu400PhefsTer4	c.1198del	frameshift_variant				1	32892	3.04025e-05	0	0	0	6850	0	0
13-32332778-AAAAG-A	NM_000059.4	BRCA2	13-32332778-AAAAG-A	13	32332778	rs80359277	AAAAG	A	p.Lys437IlefsTer22	p.Lys437IlefsTer22	c.1310_1313del	frameshift_variant	Pathogenic	37737		3	32906	9.11688e-05	0	0	0	6852	0	0
13-32336632-TTTATA-T	NM_000059.4	BRCA2	13-32336632-TTTATA-T	13	32336632	rs770648856	TTTATA	T	p.Leu760Ter	p.Leu760Ter	c.2279_2283del	frameshift_variant	Pathogenic	254499	lof_flag	1	32886	3.04081e-05	0	0	0	6852	0	0
13-32336667-T-G	NM_000059.4	BRCA2	13-32336667-T-G	13	32336667	rs587782095	T	G	p.Leu771Ter	p.Leu771Ter	c.2312T>G	stop_gained	Pathogenic	141901	lof_flag	1	32898	3.0397e-05	0	0	1	6852	0	0
13-32336831-G-GA	NM_000059.4	BRCA2	13-32336831-G-GA	13	32336831	rs397507286	G	GA	p.Asn827LysfsTer3	p.Asn827LysfsTer3	c.2480dup	frameshift_variant	Pathogenic	37787	lof_flag	1	32862	3.04303e-05	0	0	0	6846	0	0
13-32336967-C-A	NM_000059.4	BRCA2	13-32336967-C-A	13	32336967	rs397507634	C	A	p.Ser871Ter	p.Ser871Ter	c.2612C>A	stop_gained	Pathogenic	51315	lof_flag	1	32866	3.04266e-05	0	0	0	6846	0	0
13-32337030-TC-T	NM_000059.4	BRCA2	13-32337030-TC-T	13	32337030	rs879254111	TC	T	p.Gln893LysfsTer2	p.Gln893LysfsTer2	c.2677del	frameshift_variant	Pathogenic	246127	lof_flag	1	32906	3.03896e-05	0	0	0	6850	0	0
13-32337160-TA-T	NM_000059.4	BRCA2	13-32337160-TA-T	13	32337160	rs398122753	TA	T	p.Lys936AsnfsTer24	p.Lys936AsnfsTer24	c.2808del	frameshift_variant	Pathogenic	91787	lof_flag	2	32900	6.07903e-05	0	0	0	6846	0	0
13-32337185-A-T	NM_000059.4	BRCA2	13-32337185-A-T	13	32337185	rs80358533	A	T	p.Lys944Ter	p.Lys944Ter	c.2830A>T	stop_gained	Pathogenic	51355	lof_flag	1	32912	3.03841e-05	0	0	0	6850	0	0
13-32337804-C-CT	NM_000059.4	BRCA2	13-32337804-C-CT	13	32337804	rs397507668	C	CT	p.Ile1151TyrfsTer7	p.Ile1151TyrfsTer7	c.3450dup	frameshift_variant	Pathogenic	419825	lof_flag	1	32886	3.04081e-05	0	0	0	6846	0	0
13-32338200-CTG-C	NM_000059.4	BRCA2	13-32338200-CTG-C	13	32338200	rs80359405	CTG	C	p.Val1283LysfsTer2	p.Val1283LysfsTer2	c.3847_3848del	frameshift_variant	Pathogenic	37859	lof_flag	1	32794	3.04934e-05	0	0	1	6840	0	0
13-32338238-C-T	NM_000059.4	BRCA2	13-32338238-C-T	13	32338238	rs879255309	C	T	p.Gln1295Ter	p.Gln1295Ter	c.3883C>T	stop_gained	Pathogenic	252424	lof_flag	1	32812	3.04767e-05	0	0	0	6838	0	0
13-32338277-G-T	NM_000059.4	BRCA2	13-32338277-G-T	13	32338277	rs80358638	G	T	p.Glu1308Ter	p.Glu1308Ter	c.3922G>T	stop_gained	Pathogenic	37867	lof_flag	5	32862	0.000152151	0	0	0	6840	0	0
13-32338808-ATAGT-A	NM_000059.4	BRCA2	13-32338808-ATAGT-A	13	32338808	rs80359449	ATAGT	A	p.Val1486AsnfsTer5	p.Val1486AsnfsTer5	c.4456_4459del	frameshift_variant	Pathogenic	51650	lof_flag	1	32894	3.04007e-05	0	0	0	6842	0	0
13-32338906-AG-A	NM_000059.4	BRCA2	13-32338906-AG-A	13	32338906	rs398122783	AG	A	p.Glu1518AsnfsTer25	p.Glu1518AsnfsTer25	c.4552del	frameshift_variant	Pathogenic	91822	lof_flag	1	32902	3.03933e-05	0	0	0	6846	0	0
13-32338986-A-AG	NM_000059.4	BRCA2	13-32338986-A-AG	13	32338986		A	AG	p.Asn1544LysfsTer4	p.Asn1544LysfsTer4	c.4631_4632insG	frameshift_variant			lof_flag	1	32854	3.04377e-05	0	0	0	6838	0	0
13-32339498-TTGTA-T	NM_000059.4	BRCA2	13-32339498-TTGTA-T	13	32339498	rs276174854	TTGTA	T	p.Tyr1716LysfsTer8	p.Tyr1716LysfsTer8	c.5146_5149del	frameshift_variant	Pathogenic	51779	lof_flag	1	32898	3.0397e-05	0	0	0	6846	0	0
13-32339596-C-CTA	NM_000059.4	BRCA2	13-32339596-C-CTA	13	32339596	rs749980674	C	CTA	p.Ser1748Ter	p.Ser1748Ter	c.5241_5242insTA	frameshift_variant	Pathogenic	254555	lof_flag	1	32886	3.04081e-05	0	0	0	6842	0	0
13-32340107-CAT-C	NM_000059.4	BRCA2	13-32340107-CAT-C	13	32340107	rs397507803	CAT	C	p.His1918GlnfsTer5	p.His1918GlnfsTer5	c.5754_5755del	frameshift_variant	Pathogenic	51929	lof_flag	1	32884	3.04099e-05	0	0	1	6842	0	0
13-32340202-TGTTA-T	NM_000059.4	BRCA2	13-32340202-TGTTA-T	13	32340202	rs80359543	TGTTA	T	p.Ser1951TrpfsTer11	p.Ser1951TrpfsTer11	c.5851_5854del	frameshift_variant	Pathogenic	38001	lof_flag	1	32902	3.03933e-05	0	0	0	6842	0	0
13-32340300-GT-G	NM_000059.4	BRCA2	13-32340300-GT-G	13	32340300	rs80359550	GT	G	p.Ser1982ArgfsTer22	p.Ser1982ArgfsTer22	c.5946del	frameshift_variant	Pathogenic	9325	lof_flag	1	32896	3.03988e-05	0	0	1	6846	0	0
13-32340432-C-CA	NM_000059.4	BRCA2	13-32340432-C-CA	13	32340432	rs397507826	C	CA	p.Arg2027LysfsTer22	p.Arg2027LysfsTer22	c.6079dup	frameshift_variant	Pathogenic	52005	lof_flag	1	32878	3.04155e-05	0	0	1	6830	0	0
13-32340453-T-TATTAA	NM_000059.4	BRCA2	13-32340453-T-TATTAA	13	32340453		T	TATTAA	p.Arg2034LeufsTer8	p.Arg2034LeufsTer8	c.6099_6100insTTAAA	frameshift_variant			lof_flag	1	32908	3.03877e-05	0	0	0	6846	0	0
13-32354916-G-T	NM_000059.4	BRCA2	13-32354916-G-T	13	32354916	rs200078639	G	T	p.Glu2355Ter	p.Glu2355Ter	c.7063G>T	stop_gained	Pathogenic	254595	lof_flag	1	32896	3.03988e-05	0	0	0	6852	0	0
13-32355104-CAG-C	NM_000059.4	BRCA2	13-32355104-CAG-C	13	32355104	rs80359644	CAG	C	p.Arg2418SerfsTer2	p.Arg2418SerfsTer2	c.7254_7255del	frameshift_variant	Pathogenic	52300	lof_flag	1	32882	3.04118e-05	0	0	1	6854	0	0
13-32356472-C-T	NM_000059.4	BRCA2	13-32356472-C-T	13	32356472	rs80358972	C	T	p.Arg2494Ter	p.Arg2494Ter	c.7480C>T	stop_gained	Pathogenic	38099		2	32876	6.08347e-05	0	0	0	6850	0	0
13-32356550-C-T	NM_000059.4	BRCA2	13-32356550-C-T	13	32356550	rs80358981	C	T	p.Arg2520Ter	p.Arg2520Ter	c.7558C>T	stop_gained	Pathogenic	52353		1	32894	3.04007e-05	0	0	0	6850	0	0
13-32357820-G-GA	NM_000059.4	BRCA2	13-32357820-G-GA	13	32357820	rs397507934	G	GA	p.Asp2566GlufsTer5	p.Asp2566GlufsTer5	c.7697dup	frameshift_variant	Pathogenic	52390		1	32880	3.04136e-05	0	0	0	6846	0	0
13-32363211-C-T	NM_000059.4	BRCA2	13-32363211-C-T	13	32363211	rs80359035	C	T	p.Ser2670Leu	p.Ser2670Leu	c.8009C>T	missense_variant	Pathogenic/Likely pathogenic	52471		1	32800	3.04878e-05	0	0	0	6852	0	0
13-32370420-C-T	NM_000059.4	BRCA2	13-32370420-C-T	13	32370420	rs80359075	C	T	p.Arg2784Trp	p.Arg2784Trp	c.8350C>T	missense_variant	Pathogenic/Likely pathogenic	38155		1	32874	3.04192e-05	0	0	0	6846	0	0
13-32379885-C-CA	NM_000059.4	BRCA2	13-32379885-C-CA	13	32379885	rs397507419	C	CA	p.Thr3033AsnfsTer11	p.Thr3033AsnfsTer11	c.9097dup	frameshift_variant	Pathogenic	38208		1	32736	3.05474e-05	0	0	1	6830	0	0
13-32380005-A-G	NM_000059.4	BRCA2	13-32380005-A-G	13	32380005	rs81002862	A	G	c.9118-2A>G		c.9118-2A>G	splice_acceptor_variant	Pathogenic	52759		1	32898	3.0397e-05	0	0	0	6852	0	0
13-32394814-C-T	NM_000059.4	BRCA2	13-32394814-C-T	13	32394814	rs80359212	C	T	p.Arg3128Ter	p.Arg3128Ter	c.9382C>T	stop_gained	Pathogenic	52826		2	32882	6.08236e-05	0	0	0	6846	0	0
13-32396987-CTG-C	NM_000059.4	BRCA2	13-32396987-CTG-C	13	32396987	rs1566260198	CTG	C	p.Cys3198TyrfsTer23	p.Cys3198TyrfsTer23	c.9593_9594del	frameshift_variant	Pathogenic/Likely pathogenic	562471	lof_flag	1	32882	3.04118e-05	0	0	0	6850	0	0
13-32398209-TTGTA-T	NM_000059.4	BRCA2	13-32398209-TTGTA-T	13	32398209	rs80359775	TTGTA	T	p.Cys3233TrpfsTer15	p.Cys3233TrpfsTer15	c.9699_9702del	frameshift_variant	Likely pathogenic	38260	lc_lof,lof_flag	2	32908	6.07755e-05	0	0	1	6854	0	0
11-108227666-AC-A	NM_000051.4	ATM	11-108227666-AC-A	11	108227666	rs771887195	AC	A	p.Leu15Ter	p.Leu15Ter	c.43del	frameshift_variant	Pathogenic	232822		1	32888	3.04062e-05	0	0	0	6850	0	0
11-108227806-C-T	NM_000051.4	ATM	11-108227806-C-T	11	108227806	rs55861249	C	T	p.Arg35Ter	p.Arg35Ter	c.103C>T	stop_gained	Pathogenic/Likely pathogenic	3025		1	32816	3.04729e-05	0	0	0	6846	0	0
11-108227873-G-A	NM_000051.4	ATM	11-108227873-G-A	11	108227873	rs587779818	G	A	p.Trp57Ter	p.Trp57Ter	c.170G>A	stop_gained	Pathogenic	127341		1	32802	3.04859e-05	0	0	0	6836	0	0
11-108229177-G-A	NM_000051.4	ATM	11-108229177-G-A	11	108229177	rs1259911051	G	A	c.186-1G>A		c.186-1G>A	splice_acceptor_variant	Likely pathogenic	481091		1	32872	3.0421e-05	0	0	0	6848	0	0
11-108244927-C-T	NM_000051.4	ATM	11-108244927-C-T	11	108244927	rs557012154	C	T	p.Gln268Ter	p.Gln268Ter	c.802C>T	stop_gained	Pathogenic/Likely pathogenic	188961		1	32824	3.04655e-05	0	0	1	6850	0	0
11-108247101-G-T	NM_000051.4	ATM	11-108247101-G-T	11	108247101	rs529202615	G	T	p.Glu347Ter	p.Glu347Ter	c.1039G>T	stop_gained	Pathogenic	1773580		3	32866	9.12797e-05	0	0	0	6846	0	0
11-108249102-G-A	NM_000051.4	ATM	11-108249102-G-A	11	108249102	rs587779813	G	A	p.Trp412Ter	p.Trp412Ter	c.1235G>A	stop_gained	Pathogenic	127334		1	32834	3.04562e-05	0	0	1	6848	0	0
11-108250834-C-T	NM_000051.4	ATM	11-108250834-C-T	11	108250834	rs749036865	C	T	p.Arg457Ter	p.Arg457Ter	c.1369C>T	stop_gained	Pathogenic	219999		1	32866	3.04266e-05	0	0	0	6850	0	0
11-108250854-ATTGTG-A	NM_000051.4	ATM	11-108250854-ATTGTG-A	11	108250854		ATTGTG	A	p.Leu464SerfsTer21	p.Leu464SerfsTer21	c.1391_1395del	frameshift_variant	Pathogenic	943164		1	32902	3.03933e-05	0	0	1	6850	0	0
11-108250866-CAA-C	NM_000051.4	ATM	11-108250866-CAA-C	11	108250866	rs587781347	CAA	C	p.Lys468GlufsTer18	p.Lys468GlufsTer18	c.1402_1403del	frameshift_variant	Pathogenic	140889		1	32870	3.04229e-05	0	0	0	6844	0	0
11-108254032-C-G	NM_000051.4	ATM	11-108254032-C-G	11	108254032		C	G	p.Ser706Ter	p.Ser706Ter	c.2117C>G	stop_gained	Pathogenic/Likely pathogenic	2679784		1	32842	3.04488e-05	0	0	0	6852	0	0
11-108268575-C-CGCTA	NM_000051.4	ATM	11-108268575-C-CGCTA	11	108268575	rs757237504	C	CGCTA	p.Glu937AlafsTer33	p.Glu937AlafsTer33	c.2806_2809dup	frameshift_variant	Pathogenic/Likely pathogenic	420010		1	32880	3.04136e-05	0	0	0	6848	0	0
11-108271407-G-T	NM_000051.4	ATM	11-108271407-G-T	11	108271407	rs192810283	G	T	c.3077+1G>T		c.3077+1G>T	splice_donor_variant	Pathogenic/Likely pathogenic	936903		1	32882	3.04118e-05	0	0	0	6850	0	0
11-108272591-T-C	NM_000051.4	ATM	11-108272591-T-C	11	108272591	rs568461905	T	C	p.Leu1046Pro	p.Leu1046Pro	c.3137T>C	missense_variant	Likely pathogenic	186558		1	32910	3.03859e-05	0	0	0	6852	0	0
11-108272600-T-A	NM_000051.4	ATM	11-108272600-T-A	11	108272600		T	A	p.Leu1049Ter	p.Leu1049Ter	c.3146T>A	stop_gained				1	32900	3.03951e-05	0	0	0	6854	0	0
11-108272847-CA-C	NM_000051.4	ATM	11-108272847-CA-C	11	108272847	rs776516754	CA	C	p.Asn1094IlefsTer15	p.Asn1094IlefsTer15	c.3281del	frameshift_variant	Pathogenic/Likely pathogenic	581217		1	32890	3.04044e-05	0	0	0	6854	0	0
11-108282762-TG-T	NM_000051.4	ATM	11-108282762-TG-T	11	108282762	rs1064795885	TG	T	p.Ala1211HisfsTer4	p.Ala1211HisfsTer4	c.3631del	frameshift_variant	Pathogenic/Likely pathogenic	422599		1	32908	3.03877e-05	0	0	0	6852	0	0
11-108284411-C-T	NM_000051.4	ATM	11-108284411-C-T	11	108284411	rs200976093	C	T	p.Gln1311Ter	p.Gln1311Ter	c.3931C>T	stop_gained	Pathogenic	127378		1	32864	3.04284e-05	0	0	0	6842	0	0
11-108287712-C-A	NM_000051.4	ATM	11-108287712-C-A	11	108287712	rs1057520640	C	A	p.Ser1369Ter	p.Ser1369Ter	c.4106C>A	stop_gained	Pathogenic/Likely pathogenic	379550		1	32880	3.04136e-05	0	0	1	6852	0	0
11-108294951-AGT-A	NM_000051.4	ATM	11-108294951-AGT-A	11	108294951	rs864622290	AGT	A	p.Val1602LeufsTer2	p.Val1602LeufsTer2	c.4804_4805del	frameshift_variant	Pathogenic/Likely pathogenic	219873		1	32870	3.04229e-05	0	0	0	6854	0	0
11-108295002-C-T	NM_000051.4	ATM	11-108295002-C-T	11	108295002	rs762083530	C	T	p.Arg1618Ter	p.Arg1618Ter	c.4852C>T	stop_gained	Pathogenic	187207		1	32890	3.04044e-05	0	0	0	6854	0	0
11-108297285-A-T	NM_000051.4	ATM	11-108297285-A-T	11	108297285	rs1555103156	A	T	c.4910-2A>T		c.4910-2A>T	splice_acceptor_variant	Conflicting classifications of pathogenicity	490589		1	32904	3.03914e-05	0	0	0	6854	0	0
11-108301672-T-TA	NM_000051.4	ATM	11-108301672-T-TA	11	108301672	rs878853518	T	TA	p.Thr1735AsnfsTer14	p.Thr1735AsnfsTer14	c.5203dup	frameshift_variant	Pathogenic/Likely pathogenic	236731		1	32912	3.03841e-05	0	0	0	6854	0	0
11-108301759-TC-T	NM_000051.4	ATM	11-108301759-TC-T	11	108301759	rs587779846	TC	T	p.Leu1764TyrfsTer12	p.Leu1764TyrfsTer12	c.5290del	frameshift_variant	Pathogenic	127405		1	32900	3.03951e-05	0	0	1	6850	0	0
11-108304801-C-T	NM_000051.4	ATM	11-108304801-C-T	11	108304801	rs376603775	C	T	p.Arg1875Ter	p.Arg1875Ter	c.5623C>T	stop_gained	Pathogenic	245815		2	32850	6.08828e-05	0	0	0	6854	0	0
11-108304822-C-T	NM_000051.4	ATM	11-108304822-C-T	11	108304822	rs786204433	C	T	p.Arg1882Ter	p.Arg1882Ter	c.5644C>T	stop_gained	Pathogenic/Likely pathogenic	188737		1	32896	3.03988e-05	0	0	0	6854	0	0
11-108310305-C-T	NM_000051.4	ATM	11-108310305-C-T	11	108310305	rs587781722	C	T	p.Gln1970Ter	p.Gln1970Ter	c.5908C>T	stop_gained	Pathogenic	141404		3	32778	9.15248e-05	0	0	0	6838	0	0
11-108312424-G-T	NM_000051.4	ATM	11-108312424-G-T	11	108312424	rs587779852	G	T	p.Glu1978Ter	p.Glu1978Ter	c.5932G>T	stop_gained	Pathogenic	127414		1	32884	3.04099e-05	0	0	1	6850	0	0
11-108315912-G-A	NM_000051.4	ATM	11-108315912-G-A	11	108315912	rs587781584	G	A	c.6095+1G>A		c.6095+1G>A	splice_donor_variant	Pathogenic/Likely pathogenic	141218		1	32882	3.04118e-05	0	0	1	6852	0	0
11-108317381-G-GA	NM_000051.4	ATM	11-108317381-G-GA	11	108317381	rs765592353	G	GA	p.Asn2070LysfsTer18	p.Asn2070LysfsTer18	c.6209dup	frameshift_variant				1	32742	3.05418e-05	0	0	0	6832	0	0
11-108317480-AG-A	NM_000051.4	ATM	11-108317480-AG-A	11	108317480		AG	A	p.Ala2103HisfsTer17	p.Ala2103HisfsTer17	c.6307del	frameshift_variant				1	32476	3.0792e-05	0	0	0	6766	0	0
11-108325308-A-C	NM_000051.4	ATM	11-108325308-A-C	11	108325308		A	C	c.6573-2A>C		c.6573-2A>C	splice_acceptor_variant	Likely pathogenic	1501692		1	29690	3.36814e-05	0	0	0	6656	0	0
11-108325395-C-T	NM_000051.4	ATM	11-108325395-C-T	11	108325395	rs1060501536	C	T	p.Gln2220Ter	p.Gln2220Ter	c.6658C>T	stop_gained	Pathogenic	407464		1	32708	3.05736e-05	0	0	0	6824	0	0
11-108325398-G-T	NM_000051.4	ATM	11-108325398-G-T	11	108325398		G	T	p.Glu2221Ter	p.Glu2221Ter	c.6661G>T	stop_gained	Pathogenic	1070130		1	32808	3.04804e-05	0	0	0	6840	0	0
11-108325408-TGG-T	NM_000051.4	ATM	11-108325408-TGG-T	11	108325408		TGG	T	p.Met2224IlefsTer24	p.Met2224IlefsTer24	c.6672_6673del	frameshift_variant				2	32894	6.08014e-05	0	0	0	6850	0	0
11-108325413-CTACG-C	NM_000051.4	ATM	11-108325413-CTACG-C	11	108325413		CTACG	C	p.Leu2226ProfsTer8	p.Leu2226ProfsTer8	c.6677_6680del	frameshift_variant				2	32842	6.08976e-05	0	0	0	6840	0	0
11-108326152-C-CA	NM_000051.4	ATM	11-108326152-C-CA	11	108326152	rs773570504	C	CA	p.Glu2304GlyfsTer69	p.Glu2304GlyfsTer69	c.6908dup	frameshift_variant	Pathogenic	453647		1	32750	3.05344e-05	0	0	0	6834	0	0
11-108329020-G-A	NM_000051.4	ATM	11-108329020-G-A	11	108329020		G	A	c.7090-1G>A		c.7090-1G>A	splice_acceptor_variant	Likely pathogenic	3148135		1	32902	3.03933e-05	0	0	0	6850	0	0
11-108331498-G-C	NM_000051.4	ATM	11-108331498-G-C	11	108331498	rs769142993	G	C	p.Ala2524Pro	p.Ala2524Pro	c.7570G>C	missense_variant	Pathogenic/Likely pathogenic	187613		1	32738	3.05455e-05	0	0	0	6826	0	0
11-108331877-A-C	NM_000051.4	ATM	11-108331877-A-C	11	108331877	rs587779866	A	C	c.7630-2A>C		c.7630-2A>C	splice_acceptor_variant	Pathogenic	127447		1	32870	3.04229e-05	0	0	1	6850	0	0
11-108331950-CAG-C	NM_000051.4	ATM	11-108331950-CAG-C	11	108331950	rs759965045	CAG	C	p.Asp2569Ter	p.Asp2569Ter	c.7705_7706del	frameshift_variant	Pathogenic/Likely pathogenic	220550		1	32872	3.0421e-05	0	0	0	6852	0	0
11-108332765-C-T	NM_000051.4	ATM	11-108332765-C-T	11	108332765	rs138941496	C	T	p.Arg2598Ter	p.Arg2598Ter	c.7792C>T	stop_gained	Pathogenic	265383		1	32784	3.05027e-05	0	0	1	6840	0	0
11-108332848-T-G	NM_000051.4	ATM	11-108332848-T-G	11	108332848	rs1196903858	T	G	p.Asp2625Glu	p.Asp2625Glu	c.7875T>G	missense_variant	Pathogenic	802788		1	32892	3.04025e-05	0	0	1	6852	0	0
11-108332849-G-C	NM_000051.4	ATM	11-108332849-G-C	11	108332849	rs267606669	G	C	p.Ala2626Pro	p.Ala2626Pro	c.7876G>C	missense_variant	Pathogenic	802789		1	32864	3.04284e-05	0	0	1	6852	0	0
11-108332886-G-A	NM_000051.4	ATM	11-108332886-G-A	11	108332886	rs377349459	G	A	p.Trp2638Ter	p.Trp2638Ter	c.7913G>A	stop_gained	Pathogenic/Likely pathogenic	141233		2	32866	6.08532e-05	0	0	0	6844	0	0
11-108335105-T-C	NM_000051.4	ATM	11-108335105-T-C	11	108335105	rs587782652	T	C	p.Val2716Ala	p.Val2716Ala	c.8147T>C	missense_variant	Pathogenic/Likely pathogenic	142700		2	32902	6.07866e-05	0	0	2	6850	0	0
11-108335956-TATAAG-T	NM_000051.4	ATM	11-108335956-TATAAG-T	11	108335956	rs730881294	TATAAG	T	p.Tyr2755CysfsTer12	p.Tyr2755CysfsTer12	c.8264_8268del	frameshift_variant	Pathogenic	181865		1	32864	3.04284e-05	0	0	0	6850	0	0
11-108335959-A-T	NM_000051.4	ATM	11-108335959-A-T	11	108335959	rs371638537	A	T	p.Lys2756Ter	p.Lys2756Ter	c.8266A>T	stop_gained	Pathogenic	135780		1	32888	3.04062e-05	0	0	1	6852	0	0
11-108343243-AGT-A	NM_000051.4	ATM	11-108343243-AGT-A	11	108343243	rs879254036	AGT	A	p.Ser2764ArgfsTer4	p.Ser2764ArgfsTer4	c.8292_8293del	frameshift_variant	Pathogenic/Likely pathogenic	245989		1	32892	3.04025e-05	0	0	1	6854	0	0
11-108353881-G-A	NM_000051.4	ATM	11-108353881-G-A	11	108353881	rs17174393	G	A	c.8786+1G>A		c.8786+1G>A	splice_donor_variant	Pathogenic	127463		1	32844	3.0447e-05	0	0	1	6850	0	0
11-108354837-TGAGAAACTCTC-T	NM_000051.4	ATM	11-108354837-TGAGAAACTCTC-T	11	108354837	rs758814126	TGAGAAACTCTC	T	p.Met2938IlefsTer14	p.Met2938IlefsTer14	c.8814_8824del	frameshift_variant	Pathogenic/Likely pathogenic	370841		1	32920	3.03767e-05	0	0	0	6854	0	0
11-108365324-G-C	NM_000051.4	ATM	11-108365324-G-C	11	108365324	rs730881386	G	C	c.8988-1G>C		c.8988-1G>C	splice_acceptor_variant	Pathogenic/Likely pathogenic	181987		1	32888	3.04062e-05	0	0	0	6850	0	0
11-108365476-C-T	NM_000051.4	ATM	11-108365476-C-T	11	108365476	rs121434219	C	T	p.Arg3047Ter	p.Arg3047Ter	c.9139C>T	stop_gained	Pathogenic	3029		1	32860	3.04321e-05	0	0	0	6852	0	0
22-28687974-G-A	NM_007194.4	CHEK2	22-28687974-G-A	22	28687974	rs200432447	G	A	p.Arg519Ter	p.Arg519Ter	c.1555C>T	stop_gained	Pathogenic/Likely pathogenic	128064	segdup	1	32232	3.10251e-05	0	0	0	6722	0	0
22-28687982-GAAGGCTGAAAATA-G	NM_007194.4	CHEK2	22-28687982-GAAGGCTGAAAATA-G	22	28687982	rs1555911638	GAAGGCTGAAAATA	G	c.1543-9_1546del		c.1543-9_1546del	splice_acceptor_variant	Pathogenic/Likely pathogenic	530119	segdup	1	32884	3.04099e-05	0	0	1	6852	0	0
22-28695238-TA-T	NM_007194.4	CHEK2	22-28695238-TA-T	22	28695238	rs587780174	TA	T	p.Ser422ValfsTer15	p.Ser422ValfsTer15	c.1263del	frameshift_variant	Pathogenic/Likely pathogenic	128053	segdup	1	32868	3.04247e-05	0	0	1	6848	0	0
22-28695868-AG-A	NM_007194.4	CHEK2	22-28695868-AG-A	22	28695868	rs555607708	AG	A	p.Thr367MetfsTer15	p.Thr367MetfsTer15	c.1100del	frameshift_variant	Pathogenic	128042	segdup	79	32904	0.00240092	0	0	15	6854	0	0
22-28699925-TC-T	NM_007194.4	CHEK2	22-28699925-TC-T	22	28699925	rs786203053	TC	T	p.Gly307GlufsTer13	p.Gly307GlufsTer13	c.920del	frameshift_variant	Pathogenic	233191		1	32826	3.04637e-05	0	0	1	6846	0	0
22-28711907-A-G	NM_007194.4	CHEK2	22-28711907-A-G	22	28711907	rs545982789	A	G	c.792+2T>C		c.792+2T>C	splice_donor_variant	Conflicting classifications of pathogenicity	220480		1	32912	3.03841e-05	0	0	1	6852	0	0
22-28711907-ACT-A	NM_007194.4	CHEK2	22-28711907-ACT-A	22	28711907	rs774831804	ACT	A	c.792_792+1del		c.792_792+1del	splice_donor_variant	Likely pathogenic	577097		1	32912	3.03841e-05	0	0	0	6852	0	0
22-28719480-CA-C	NM_007194.4	CHEK2	22-28719480-CA-C	22	28719480	rs1250779080	CA	C	p.Phe199LeufsTer6	p.Phe199LeufsTer6	c.597del	frameshift_variant	Pathogenic	483374		1	32826	3.04637e-05	0	0	1	6838	0	0
22-28724977-CT-C	NM_007194.4	CHEK2	22-28724977-CT-C	22	28724977	rs587782245	CT	C	p.Val198PhefsTer7	p.Val198PhefsTer7	c.591del	frameshift_variant	Pathogenic/Likely pathogenic	142114		1	32814	3.04748e-05	0	0	1	6848	0	0
22-28725070-C-T	NM_007194.4	CHEK2	22-28725070-C-T	22	28725070	rs72552322	C	T	p.Gly167Arg	p.Gly167Arg	c.499G>A	missense_variant	Pathogenic/Likely pathogenic	142524		1	32888	3.04062e-05	0	0	0	6852	0	0
22-28725241-A-C	NM_007194.4	CHEK2	22-28725241-A-C	22	28725241	rs560596101	A	C	c.444+2T>G		c.444+2T>G	splice_donor_variant	Likely pathogenic	2584223		1	32886	3.04081e-05	0	0	0	6850	0	0
22-28725242-C-T	NM_007194.4	CHEK2	22-28725242-C-T	22	28725242	rs121908698	C	T	c.444+1G>A		c.444+1G>A	splice_donor_variant	Pathogenic/Likely pathogenic	128075		1	32884	3.04099e-05	0	0	1	6852	0	0
22-28725254-G-A	NM_007194.4	CHEK2	22-28725254-G-A	22	28725254	rs137853007	G	A	p.Arg145Trp	p.Arg145Trp	c.433C>T	missense_variant	Likely pathogenic	5592		2	32872	6.08421e-05	0	0	0	6852	0	0
22-28725278-G-A	NM_007194.4	CHEK2	22-28725278-G-A	22	28725278	rs730881701	G	A	p.Arg137Ter	p.Arg137Ter	c.409C>T	stop_gained	Pathogenic	182452		1	32856	3.04358e-05	0	0	0	6850	0	0
22-28734401-A-T	NM_007194.4	CHEK2	22-28734401-A-T	22	28734401	rs587782401	A	T	c.319+2T>A		c.319+2T>A	splice_donor_variant	Pathogenic/Likely pathogenic	142352		4	32918	0.000121514	0	0	0	6854	0	0
22-28734474-TG-T	NM_007194.4	CHEK2	22-28734474-TG-T	22	28734474	rs587782766	TG	T	p.Gln83LysfsTer27	p.Gln83LysfsTer27	c.247del	frameshift_variant	Pathogenic/Likely pathogenic	142851		1	32870	3.04229e-05	0	0	1	6850	0	0
22-28734664-G-A	NM_007194.4	CHEK2	22-28734664-G-A	22	28734664	rs536907995	G	A	p.Gln20Ter	p.Gln20Ter	c.58C>T	stop_gained	Conflicting classifications of pathogenicity	133887		5	32864	0.000152142	0	0	0	6852	0	0
2-47798658-TGA-T	NM_000179.3	MSH6	2-47798658-TGA-T	2	47798658	rs1460246967	TGA	T	p.Ser227Ter	p.Ser227Ter	c.679_680del	frameshift_variant	Pathogenic	2036677		1	32836	3.04544e-05	0	0	1	6852	0	0
2-47798875-C-T	NM_000179.3	MSH6	2-47798875-C-T	2	47798875	rs146816935	C	T	p.Arg298Ter	p.Arg298Ter	c.892C>T	stop_gained	Pathogenic	89574		1	32854	3.04377e-05	0	0	1	6852	0	0
2-47799150-CG-C	NM_000179.3	MSH6	2-47799150-CG-C	2	47799150	rs753796271	CG	C	p.Asp390IlefsTer21	p.Asp390IlefsTer21	c.1168del	frameshift_variant	Pathogenic	428404		1	32760	3.0525e-05	0	0	0	6838	0	0
2-47800177-C-T	NM_000179.3	MSH6	2-47800177-C-T	2	47800177	rs63751127	C	T	p.Arg732Ter	p.Arg732Ter	c.2194C>T	stop_gained	Pathogenic	89262		1	32874	3.04192e-05	0	0	1	6852	0	0
2-47800297-C-T	NM_000179.3	MSH6	2-47800297-C-T	2	47800297	rs63750138	C	T	p.Arg772Trp	p.Arg772Trp	c.2314C>T	missense_variant	Pathogenic	89267		1	32852	3.04395e-05	0	0	1	6852	0	0
2-47800966-G-T	NM_000179.3	MSH6	2-47800966-G-T	2	47800966	rs63750258	G	T	p.Glu995Ter	p.Glu995Ter	c.2983G>T	stop_gained	Pathogenic	89328		1	32878	3.04155e-05	0	0	0	6852	0	0
2-47803449-C-T	NM_000179.3	MSH6	2-47803449-C-T	2	47803449	rs63749843	C	T	p.Arg1068Ter	p.Arg1068Ter	c.3202C>T	stop_gained	Pathogenic	89352		1	32874	3.04192e-05	0	0	0	6850	0	0
2-47803500-A-AC	NM_000179.3	MSH6	2-47803500-A-AC	2	47803500	rs267608078	A	AC	p.Phe1088LeufsTer5	p.Phe1088LeufsTer5	c.3261dup	frameshift_variant	Pathogenic	89364		1	32326	3.09349e-05	0	0	0	6776	0	0
2-47804958-G-T	NM_000179.3	MSH6	2-47804958-G-T	2	47804958	rs587779267	G	T	p.Glu1163Ter	p.Glu1163Ter	c.3487G>T	stop_gained	Pathogenic	89399		1	32892	3.04025e-05	0	0	1	6850	0	0
2-47804982-GATAGAGTGTTT-G	NM_000179.3	MSH6	2-47804982-GATAGAGTGTTT-G	2	47804982	rs1324100572	GATAGAGTGTTT	G	p.Arg1172Ter	p.Arg1172Ter	c.3513_3523del	frameshift_variant	Pathogenic	455267		1	32864	3.04284e-05	0	0	0	6844	0	0
2-47806588-T-TTCAAAAGGGACATAGAAAA	NM_000179.3	MSH6	2-47806588-T-TTCAAAAGGGACATAGAAAA	2	47806588	rs63750767	T	TTCAAAAGGGACATAGAAAA	p.Ala1320SerfsTer5	p.Ala1320SerfsTer5	c.3939_3957dup	frameshift_variant	Pathogenic	89486		1	32858	3.0434e-05	0	0	0	6844	0	0
2-47806641-C-T	NM_000179.3	MSH6	2-47806641-C-T	2	47806641	rs267608094	C	T	p.Arg1331Ter	p.Arg1331Ter	c.3991C>T	stop_gained	Pathogenic	42472		1	32336	3.09253e-05	0	0	1	6814	0	0
2-47806652-GTAACTAAC-G	NM_000179.3	MSH6	2-47806652-GTAACTAAC-G	2	47806652	rs267608132	GTAACTAAC	G	c.4001+8_4001+15del		c.4001+8_4001+15del	splice_donor_variant				1	32794	3.04934e-05	0	0	0	6838	0	0
2-47806819-G-GA	NM_000179.3	MSH6	2-47806819-G-GA	2	47806819		G	GA	p.Ala1349SerfsTer4	p.Ala1349SerfsTer4	c.4044dup	frameshift_variant				1	32034	3.12168e-05	0	0	0	6780	0	0
16-23603657-AC-A	NM_024675.4	PALB2	16-23603657-AC-A	16	23603657	rs515726117	AC	A	p.Gly1121ValfsTer3	p.Gly1121ValfsTer3	c.3362del	frameshift_variant	Likely pathogenic	126739		1	32794	3.04934e-05	0	0	1	6844	0	0
16-23607928-T-TCATTAAC	NM_024675.4	PALB2	16-23607928-T-TCATTAAC	16	23607928		T	TCATTAAC	p.Asn1096ValfsTer5	p.Asn1096ValfsTer5	c.3285_3286insGTTAATG	frameshift_variant	Pathogenic	1075746		2	32886	6.08162e-05	0	0	0	6852	0	0
16-23614003-C-A	NM_024675.4	PALB2	16-23614003-C-A	16	23614003	rs587776423	C	A	c.3201+1G>T		c.3201+1G>T	splice_donor_variant	Pathogenic/Likely pathogenic	141501		1	32900	3.03951e-05	0	0	0	6852	0	0
16-23621362-C-T	NM_024675.4	PALB2	16-23621362-C-T	16	23621362	rs180177132	C	T	p.Trp1038Ter	p.Trp1038Ter	c.3113G>A	stop_gained	Pathogenic	126711		1	32880	3.04136e-05	0	0	1	6854	0	0
16-23623001-TTG-T	NM_024675.4	PALB2	16-23623001-TTG-T	16	23623001	rs1555459528	TTG	T	p.Gln988SerfsTer22	p.Gln988SerfsTer22	c.2962_2963del	frameshift_variant	Pathogenic/Likely pathogenic	480247		1	32900	3.03951e-05	0	0	0	6850	0	0
16-23626254-A-T	NM_024675.4	PALB2	16-23626254-A-T	16	23626254	rs995629797	A	T	p.Tyr910Ter	p.Tyr910Ter	c.2730T>A	stop_gained	Pathogenic/Likely pathogenic	410165		2	32900	6.07903e-05	0	0	0	6852	0	0
16-23629638-A-T	NM_024675.4	PALB2	16-23629638-A-T	16	23629638	rs1343145658	A	T	c.2514+2T>A		c.2514+2T>A	splice_donor_variant				1	32896	3.03988e-05	0	0	0	6850	0	0
16-23629665-TC-T	NM_024675.4	PALB2	16-23629665-TC-T	16	23629665	rs876658813	TC	T	p.Glu830SerfsTer21	p.Glu830SerfsTer21	c.2488del	frameshift_variant	Pathogenic	230859	lof_flag	1	32914	3.03822e-05	0	0	0	6854	0	0
16-23629768-C-A	NM_024675.4	PALB2	16-23629768-C-A	16	23629768	rs180177112	C	A	p.Gly796Ter	p.Gly796Ter	c.2386G>T	stop_gained	Pathogenic/Likely pathogenic	126649	lof_flag	1	32886	3.04081e-05	0	0	0	6852	0	0
16-23629897-G-A	NM_024675.4	PALB2	16-23629897-G-A	16	23629897	rs180177110	G	A	p.Arg753Ter	p.Arg753Ter	c.2257C>T	stop_gained	Pathogenic	142403	lof_flag	1	32892	3.04025e-05	0	0	1	6852	0	0
16-23630181-TC-T	NM_024675.4	PALB2	16-23630181-TC-T	16	23630181	rs1555460548	TC	T	p.Glu658AsnfsTer2	p.Glu658AsnfsTer2	c.1972del	frameshift_variant	Pathogenic	482004	lof_flag	1	32908	3.03877e-05	0	0	0	6850	0	0
16-23634953-CA-C	NM_024675.4	PALB2	16-23634953-CA-C	16	23634953	rs180177102	CA	C	p.Leu531CysfsTer30	p.Leu531CysfsTer30	c.1592del	frameshift_variant	Pathogenic	126609	lof_flag	15	32860	0.000456482	0	0	0	6852	0	0
16-23634954-A-T	NM_024675.4	PALB2	16-23634954-A-T	16	23634954	rs540962715	A	T	p.Leu531Ter	p.Leu531Ter	c.1592T>A	stop_gained	Pathogenic	2673844	lof_flag	1	32858	3.0434e-05	0	0	1	6850	0	0
16-23635306-G-A	NM_024675.4	PALB2	16-23635306-G-A	16	23635306	rs180177100	G	A	p.Arg414Ter	p.Arg414Ter	c.1240C>T	stop_gained	Pathogenic	128117	lof_flag	1	32882	3.04118e-05	0	0	1	6852	0	0
16-23635492-CTGTT-C	NM_024675.4	PALB2	16-23635492-CTGTT-C	16	23635492	rs515726060	CTGTT	C	p.Thr351ArgfsTer4	p.Thr351ArgfsTer4	c.1050_1053del	frameshift_variant	Pathogenic	126586	lof_flag	1	32890	3.04044e-05	0	0	0	6846	0	0
16-23635514-GT-G	NM_024675.4	PALB2	16-23635514-GT-G	16	23635514	rs1485260432	GT	G	p.Asn344ThrfsTer2	p.Asn344ThrfsTer2	c.1031del	frameshift_variant	Pathogenic	480252	lof_flag	1	32902	3.03933e-05	0	0	0	6852	0	0
16-23636035-ATC-A	NM_024675.4	PALB2	16-23636035-ATC-A	16	23636035	rs515726123	ATC	A	p.Arg170IlefsTer14	p.Arg170IlefsTer14	c.509_510del	frameshift_variant	Pathogenic	126757	lof_flag	1	32886	3.04081e-05	0	0	1	6850	0	0
16-23636122-T-A	NM_024675.4	PALB2	16-23636122-T-A	16	23636122	rs587782005	T	A	p.Lys142Ter	p.Lys142Ter	c.424A>T	stop_gained	Pathogenic	141779	lof_flag	1	32802	3.04859e-05	0	0	0	6844	0	0
16-23636312-AAC-A	NM_024675.4	PALB2	16-23636312-AAC-A	16	23636312	rs776284609	AAC	A	p.Val78LeufsTer2	p.Val78LeufsTer2	c.232_233del	frameshift_variant	Pathogenic	949556	lof_flag	2	32874	6.08384e-05	0	0	0	6850	0	0
16-23637865-G-A	NM_024675.4	PALB2	16-23637865-G-A	16	23637865	rs180177083	G	A	p.Gln66Ter	p.Gln66Ter	c.196C>T	stop_gained	Pathogenic/Likely pathogenic	126629	lof_flag	1	32888	3.04062e-05	0	0	0	6848	0	0
16-23637885-GACAA-G	NM_024675.4	PALB2	16-23637885-GACAA-G	16	23637885	rs180177143	GACAA	G	p.Gln60ArgfsTer7	p.Gln60ArgfsTer7	c.172_175del	frameshift_variant	Pathogenic/Likely pathogenic	126623	lof_flag	2	32900	6.07903e-05	0	0	0	6848	0	0
16-23641145-G-GA	NM_024675.4	PALB2	16-23641145-G-GA	16	23641145	rs879254062	G	GA	p.Pro5SerfsTer8	p.Pro5SerfsTer8	c.12dup	frameshift_variant	Pathogenic	246045	lof_flag	1	32900	3.03951e-05	0	0	0	6854	0	0
17-7661988-G-C	NM_000546.6	TP53	17-7661988-G-C	17	7661988	rs570664751	G	C	p.Ser270Ter	p.Ser270Ter	c.809C>G	stop_gained				3	32774	9.1536e-05	1	0	0	6826	0	0
17-7662007-G-A	NM_000546.6	TP53	17-7662007-G-A	17	7662007		G	A	p.Gln264Ter	p.Gln264Ter	c.790C>T	stop_gained				1	32758	3.05269e-05	0	0	0	6822	0	0
17-7673750-G-GCGGTTTCCGC	NM_000546.6	TP53	17-7673750-G-GCGGTTTCCGC	17	7673750	rs764803020	G	GCGGTTTCCGC	p.Lys291ArgfsTer18	p.Lys291ArgfsTer18	c.869_870insGCGGAAACCG	frameshift_variant				1	32880	3.04136e-05	0	0	0	6850	0	0
17-7673802-C-T	NM_000546.6	TP53	17-7673802-C-T	17	7673802	rs28934576	C	T	p.Arg273His	p.Arg273His	c.818G>A	missense_variant	Pathogenic	12366		1	32858	3.0434e-05	0	0	1	6846	0	0
17-7674229-C-T	NM_000546.6	TP53	17-7674229-C-T	17	7674229	rs121912656	C	T	p.Gly245Asp	p.Gly245Asp	c.734G>A	missense_variant	Pathogenic/Likely pathogenic	12355		1	32834	3.04562e-05	0	0	0	6842	0	0
17-7674250-C-T	NM_000546.6	TP53	17-7674250-C-T	17	7674250	rs730882005	C	T	p.Cys238Tyr	p.Cys238Tyr	c.713G>A	missense_variant	Pathogenic/Likely pathogenic	182935		1	32810	3.04785e-05	0	0	1	6838	0	0
17-7674873-A-G	NM_000546.6	TP53	17-7674873-A-G	17	7674873	rs530941076	A	G	p.Tyr220His	p.Tyr220His	c.658T>C	missense_variant	Pathogenic/Likely pathogenic	376687		1	32898	3.0397e-05	0	0	0	6850	0	0
17-7674972-C-T	NM_000546.6	TP53	17-7674972-C-T	17	7674972	rs1202793339	C	T	c.560-1G>A		c.560-1G>A	splice_acceptor_variant	Pathogenic	634769		1	32904	3.03914e-05	0	0	0	6850	0	0
17-7675070-C-T	NM_000546.6	TP53	17-7675070-C-T	17	7675070	rs397514495	C	T	p.Arg181His	p.Arg181His	c.542G>A	missense_variant	Pathogenic/Likely pathogenic	142320		1	32906	3.03896e-05	0	0	1	6854	0	0
17-7675157-G-A	NM_000546.6	TP53	17-7675157-G-A	17	7675157	rs587782705	G	A	p.Pro152Leu	p.Pro152Leu	c.455C>T	missense_variant	Pathogenic	142766		1	32898	3.0397e-05	0	0	1	6854	0	0
17-7675217-T-C	NM_000546.6	TP53	17-7675217-T-C	17	7675217	rs1057519996	T	C	c.376-2A>G		c.376-2A>G	splice_acceptor_variant	Pathogenic/Likely pathogenic	376625		1	32852	3.04395e-05	0	0	0	6848	0	0
