# Supplementary material
Source: Research Square preprint supplement (doi:10.21203/rs.3.rs-8843307/v1)
Supplement: Supplementary file 6 [file ea65bcea963b296d64478d3b.xlsx]

## Sheet: ATM_breast
Cancer type	SYMBOL	VARIANT_CLASS	Genomic_region	Feature	Consequence	INTRON	EXON	HGVSc	HGVSp	CLNSIG	AC	AF	AN	HomoC	AC_DS_sbreastca	AF_DS_sbreastca	AN_DS_sbreastca	AC_P_maligncag	AF_P_maligncag	AN_P_maligncag	AC_P_oncog	AF_P_oncog	AN_P_oncog	HomoC_DS_sbreastca	HomoC_P_maligncag	HomoC_P_oncog
Breast	ATM	SNV	EXONIC	NM_000051.4	stop_gained		3/63	NM_000051.4:c.103C>T	NP_000042.3:p.Arg35Ter	Pathogenic/Likely_pathogenic	2	0.00052	3836	0	2	0.00118	1692	0	0	542	1	5e-05	20182	0	0	0
Breast	ATM	SNV	EXONIC	NM_000051.4	stop_gained		3/63	NM_000051.4:c.103C>T	NP_000042.3:p.Arg35Ter	Pathogenic/Likely_pathogenic	2	0.00052	3836	0	2	0.00118	1692	0	0	542	1	5e-05	20182	0	0	0
Breast	ATM	SNV	SPLICING	NM_000051.4	splice_donor_variant	4/62		NM_000051.4:c.331+2T>G		Pathogenic	1	0.00026	3834	0	1	0.00059	1690	0	0	542	0	0	21174	0	0	0
Breast	ATM	SNV	EXONIC	NM_000051.4	missense_variant		7/63	NM_000051.4:c.755G>A	NP_000042.3:p.Cys252Tyr		2	0.00052	3836	1	2	0.00118	1692	0	0	542	0	0	21174	1	0	0
Breast	ATM	SNV	SPLICING	NM_000051.4	stop_gained,splice_region_variant		10/63	NM_000051.4:c.1236G>A	NP_000042.3:p.Trp412Ter	Pathogenic	2	0.00052	3834	1	2	0.00118	1692	0	0	542	0	0	21174	1	0	0
Breast	ATM	SNV	EXONIC	NM_000051.4	stop_gained		10/63	NM_000051.4:c.1402A>T	NP_000042.3:p.Lys468Ter		2	0.00052	3836	1	2	0.00118	1692	0	0	542	0	0	21174	1	0	0
Breast	ATM	SNV	EXONIC	NM_000051.4	stop_gained		10/63	NM_000051.4:c.1442T>G	NP_000042.3:p.Leu481Ter	Pathogenic	1	0.00026	3834	0	1	0.00059	1690	0	0	542	0	0	21174	0	0	0
Breast	ATM	SNV	SPLICING	NM_000051.4	splice_region_variant,synonymous_variant		15/63	NM_000051.4:c.2376G>A	NP_000042.3:p.Lys792%3D	Conflicting_classifications_of_pathogenicity	1	0.00026	3836	0	1	0.00059	1690	0	0	542	1	5e-05	21304	0	0	0
Breast	ATM	SNV	EXONIC	NM_000051.4	missense_variant		16/63	NM_000051.4:c.2381G>A	NP_000042.3:p.Ser794Asn		1	0.00026	3832	0	1	0.00059	1690	0	0	542	0	0	21174	0	0	0
Breast	ATM	SNV	SPLICING	NM_000051.4	splice_donor_variant	19/62		NM_000051.4:c.2921+1G>A		Pathogenic/Likely_pathogenic	2	0.00052	3832	0	1	0.00059	1690	0	0	542	0	0	21174	0	0	0
Breast	ATM	deletion	EXONIC	NM_000051.4	frameshift_variant		26/63	NM_000051.4:c.3802del	NP_000042.3:p.Val1268Ter	Pathogenic	1	0.00026	3834	0	1	0.00059	1690	0	0	542	1	5e-05	20966	0	0	0
Breast	ATM	insertion	EXONIC	NM_000051.4	frameshift_variant		26/63	NM_000051.4:c.3894dup	NP_000042.3:p.Ala1299CysfsTer3	Pathogenic	1	0.00026	3832	0	1	0.00059	1690	0	0	542	1	5e-05	20976	0	0	0
Breast	ATM	SNV	INTRONIC	NM_000051.4	intron_variant	33/62		NM_000051.4:c.5006-253C>G			1	0.00027	3772	0	1	0.0006	1660	0	0	536	0	0	252	0	0	0
Breast	ATM	SNV	SPLICING	NM_000051.4	splice_acceptor_variant	51/62		NM_000051.4:c.7630-2A>C		Pathogenic	1	0.00026	3830	0	1	0.00059	1690	0	0	542	0	0	21174	0	0	0
Breast	ATM	SNV	SPLICING	NM_000051.4	splice_acceptor_variant	52/62		NM_000051.4:c.7789-1G>A		Likely_pathogenic	1	0.00026	3832	0	1	0.00059	1690	0	0	542	1	5e-05	21184	0	0	0
Breast	ATM	SNV	EXONIC	NM_000051.4	missense_variant		55/63	NM_000051.4:c.8122G>A	NP_000042.3:p.Asp2708Asn	Pathogenic/Likely_pathogenic	1	0.00026	3836	0	1	0.00059	1692	0	0	542	0	0	21174	0	0	0
Breast	ATM	deletion	EXONIC	NM_000051.4	frameshift_variant		62/63	NM_000051.4:c.8934_8935del	NP_000042.3:p.Glu2979AlafsTer9	Pathogenic	1	0.00026	3834	0	1	0.00059	1690	0	0	542	0	0	21174	0	0	0
Breast	BRCA2	SNV	INTRONIC	NM_000059.4	splice_donor_region_variant,intron_variant	2/26		NM_000059.4:c.67+3A>G		Pathogenic/Likely_pathogenic	1	0.00026	3834	0	1	0.00059	1690	0	0	542	0	0	21174	0	0	0
Breast	BRCA2	SNV	EXONIC	NM_000059.4	stop_gained		3/27	NM_000059.4:c.171C>A	NP_000050.3:p.Tyr57Ter	Pathogenic	1	0.00026	3836	0	1	0.00059	1690	0	0	542	0	0	21174	0	0	0
Breast	BRCA2	deletion	EXONIC	NM_000059.4	frameshift_variant		8/27	NM_000059.4:c.658_659del	NP_000050.3:p.Val220IlefsTer4	Pathogenic	1	0.00026	3832	0	1	0.00059	1690	0	0	542	0	0	21174	0	0	0
Breast	BRCA2	deletion	EXONIC	NM_000059.4	frameshift_variant		10/27	NM_000059.4:c.1796_1800del	NP_000050.3:p.Ser599Ter	Pathogenic	1	0.00026	3834	0	1	0.00059	1690	0	0	542	0	0	21174	0	0	0
Breast	BRCA2	insertion	EXONIC	NM_000059.4	frameshift_variant		10/27	NM_000059.4:c.1813dup	NP_000050.3:p.Ile605AsnfsTer11	Pathogenic	1	0.00026	3836	0	1	0.00059	1692	0	0	542	0	0	21174	0	0	0
Breast	BRCA2	deletion	EXONIC	NM_000059.4	frameshift_variant		10/27	NM_000059.4:c.1813del	NP_000050.3:p.Ile605TyrfsTer9	Pathogenic	4	0.00104	3836	2	4	0.00236	1692	0	0	542	0	0	21174	2	0	0
Breast	BRCA2	deletion	EXONIC	NM_000059.4	frameshift_variant		10/27	NM_000059.4:c.1813del	NP_000050.3:p.Ile605TyrfsTer9	Pathogenic	4	0.00104	3836	2	4	0.00236	1692	0	0	542	0	0	21174	2	0	0
Breast	BRCA2	SNV	EXONIC	NM_000059.4	stop_gained		11/27	NM_000059.4:c.2641G>T	NP_000050.3:p.Glu881Ter	Pathogenic	1	0.00026	3830	0	1	0.00059	1688	0	0	542	0	0	21174	0	0	0
Breast	BRCA2	deletion	EXONIC	NM_000059.4	frameshift_variant		11/27	NM_000059.4:c.2808_2811del	NP_000050.3:p.Ala938ProfsTer21	Pathogenic	4	0.00104	3834	0	3	0.00178	1690	0	0	542	3	0.00014	20984	0	0	0
Breast	BRCA2	deletion	EXONIC	NM_000059.4	frameshift_variant		11/27	NM_000059.4:c.2808_2811del	NP_000050.3:p.Ala938ProfsTer21	Pathogenic	4	0.00104	3834	0	3	0.00178	1690	0	0	542	3	0.00014	20984	0	0	0
Breast	BRCA2	deletion	EXONIC	NM_000059.4	frameshift_variant		11/27	NM_000059.4:c.2808_2811del	NP_000050.3:p.Ala938ProfsTer21	Pathogenic	4	0.00104	3834	0	3	0.00178	1690	0	0	542	3	0.00014	20984	0	0	0
Breast	BRCA2	insertion	EXONIC	NM_000059.4	frameshift_variant		11/27	NM_000059.4:c.3264dup	NP_000050.3:p.Gln1089SerfsTer10	Pathogenic	2	0.00052	3868	0	1	0.00058	1724	0	0	542	0	0	21174	0	0	0
Breast	BRCA2	deletion	EXONIC	NM_000059.4	frameshift_variant		11/27	NM_000059.4:c.3680_3681del	NP_000050.3:p.Leu1227GlnfsTer5	Pathogenic	2	0.00052	3870	0	1	0.00058	1726	0	0	542	2	9e-05	21200	0	0	0
Breast	BRCA2	insertion	EXONIC	NM_000059.4	frameshift_variant		11/27	NM_000059.4:c.3860dup	NP_000050.3:p.Asn1287LysfsTer2	Pathogenic	1	0.00026	3840	0	1	0.00059	1696	0	0	542	0	0	21174	0	0	0
Breast	BRCA2	deletion	EXONIC	NM_000059.4	frameshift_variant		11/27	NM_000059.4:c.5146_5149del	NP_000050.3:p.Tyr1716LysfsTer8	Pathogenic	2	0.00052	3852	0	2	0.00117	1710	0	0	542	0	0	21174	0	0	0
Breast	BRCA2	deletion	EXONIC	NM_000059.4	frameshift_variant		11/27	NM_000059.4:c.5146_5149del	NP_000050.3:p.Tyr1716LysfsTer8	Pathogenic	2	0.00052	3852	0	2	0.00117	1710	0	0	542	0	0	21174	0	0	0
Breast	BRCA2	deletion	EXONIC	NM_000059.4	frameshift_variant		11/27	NM_000059.4:c.5946del	NP_000050.3:p.Ser1982ArgfsTer22	Pathogenic	1	0.00026	3870	0	1	0.00058	1726	0	0	542	0	0	21174	0	0	0
Breast	BRCA2	deletion	EXONIC	NM_000059.4	frameshift_variant		11/27	NM_000059.4:c.6275_6276del	NP_000050.3:p.Leu2092ProfsTer7	Pathogenic	3	0.00078	3834	0	3	0.00178	1690	0	0	542	3	0.00014	21384	0	0	0
Breast	BRCA2	deletion	EXONIC	NM_000059.4	frameshift_variant		11/27	NM_000059.4:c.6275_6276del	NP_000050.3:p.Leu2092ProfsTer7	Pathogenic	3	0.00078	3834	0	3	0.00178	1690	0	0	542	3	0.00014	21384	0	0	0
Breast	BRCA2	SNV	EXONIC	NM_000059.4	missense_variant		18/27	NM_000059.4:c.8023A>G	NP_000050.3:p.Ile2675Val	Pathogenic	1	0.00026	3836	0	1	0.00059	1690	0	0	542	0	0	21174	0	0	0
Breast	BRCA2	deletion	EXONIC	NM_000059.4	frameshift_variant		18/27	NM_000059.4:c.8285del	NP_000050.3:p.Pro2762LeufsTer15	Pathogenic	1	0.00026	3834	0	1	0.00059	1690	0	0	542	0	0	21174	0	0	0
Breast	BRCA2	SNV	SPLICING	NM_000059.4	splice_region_variant,synonymous_variant		23/27	NM_000059.4:c.9117G>A	NP_000050.3:p.Pro3039%3D	Pathogenic	1	0.00026	3834	0	1	0.00059	1690	0	0	542	0	0	21174	0	0	0
Breast	BRCA2	SNV	SPLICING	NM_000059.4	stop_gained,splice_region_variant		25/27	NM_000059.4:c.9499G>T	NP_000050.3:p.Glu3167Ter		1	0.00026	3834	0	1	0.00059	1690	0	0	542	0	0	21174	0	0	0
Ovarian	BRCA2	SNV	EXONIC	NM_000059.4	stop_gained		11/27	NM_000059.4:c.4965C>A	NP_000050.3:p.Tyr1655Ter	Pathogenic	1	0.00026	3858	0	1	0.0042	238	0	0	542	1	5e-05	21368	0	0	0
Ovarian	BRCA2	SNV	SPLICING	NM_000059.4	splice_region_variant,synonymous_variant		23/27	NM_000059.4:c.9117G>A	NP_000050.3:p.Pro3039%3D	Pathogenic	1	0.00026	3834	0	1	0.0042	238	0	0	542	0	0	21174	0	0	0
Breast	CHEK2	deletion	EXONIC	NM_007194.4	frameshift_variant		11/15	NM_007194.4:c.1188del	NP_009125.1:p.Val397PhefsTer17	Pathogenic/Likely_pathogenic	1	0.00026	3838	0	1	0.00059	1692	0	0	542	0	0	21174	0	0	0
Breast	CHEK2	deletion	INTRONIC	NM_007194.4	splice_donor_5th_base_variant,intron_variant	7/14		NM_007194.4:c.846+4_846+7del		Pathogenic/Likely_pathogenic	1	0.00026	3832	0	1	0.00059	1690	0	0	542	0	0	252	0	0	0
Breast	CHEK2	SNV	SPLICING	NM_007194.4	splice_donor_variant	7/14		NM_007194.4:c.846+1G>C		Pathogenic/Likely_pathogenic	1	0.00026	3834	0	1	0.00059	1690	0	0	542	0	0	21174	0	0	0
Breast	CHEK2	SNV	SPLICING	NM_007194.4	missense_variant,splice_region_variant		7/15	NM_007194.4:c.844C>G	NP_009125.1:p.His282Asp	Likely_pathogenic	1	0.00026	3834	0	1	0.00059	1690	0	0	542	0	0	21174	0	0	0
Breast	CHEK2	SNV	SPLICING	NM_007194.4	splice_donor_variant	2/14		NM_007194.4:c.319+2T>A		Pathogenic/Likely_pathogenic	1	0.00026	3838	0	1	0.00059	1692	0	0	542	0	0	21174	0	0	0
Colorrectal	MSH6	SNV	EXONIC	NM_000179.3	stop_gained		4/10	NM_000179.3:c.3103C>T	NP_000170.1:p.Arg1035Ter	Pathogenic	1	0.00026	3836	0	1	0.00287	348	0	0	542	0	0	21174	0	0	0
Endometrial	MSH6	SNV	EXONIC	NM_000179.3	stop_gained		4/10	NM_000179.3:c.2974G>T	NP_000170.1:p.Glu992Ter	Pathogenic/Likely_pathogenic	1	0.00026	3836	0	1	0.0082	122	0	0	542	0	0	21174	0	0	0
Endometrial	MSH6	deletion	EXONIC	NM_000179.3	inframe_deletion		4/10	NM_000179.3:c.3040_3042del	NP_000170.1:p.Lys1014del	Conflicting_classifications_of_pathogenicity	1	0.00026	3834	0	1	0.0082	122	0	0	542	0	0	21174	0	0	0
Endometrial	MSH6	insertion	EXONIC	NM_000179.3	frameshift_variant		5/10	NM_000179.3:c.3261dup	NP_000170.1:p.Phe1088LeufsTer5	Pathogenic	3	0.00078	3834	0	2	0.01639	122	1	0.00185	542	1	5e-05	21876	0	0	0
Endometrial	MSH6	insertion	EXONIC	NM_000179.3	frameshift_variant		5/10	NM_000179.3:c.3261dup	NP_000170.1:p.Phe1088LeufsTer5	Pathogenic	3	0.00078	3834	0	2	0.01639	122	1	0.00185	542	1	5e-05	21876	0	0	0
Breast	PALB2	SNV	EXONIC	NM_024675.4	stop_gained		13/13	NM_024675.4:c.3425T>G	NP_078951.2:p.Leu1142Ter	Pathogenic	1	0.00026	3836	0	1	0.00059	1692	0	0	542	0	0	21174	0	0	0
Breast	PALB2	insertion	EXONIC	NM_024675.4	frameshift_variant		11/13	NM_024675.4:c.2982dup	NP_078951.2:p.Ala995CysfsTer16	Pathogenic/Likely_pathogenic	1	0.00026	3832	0	1	0.00059	1690	0	0	542	0	0	21174	0	0	0
Breast	PALB2	SNV	EXONIC	NM_024675.4	stop_gained		5/13	NM_024675.4:c.1972G>T	NP_078951.2:p.Glu658Ter	Pathogenic	1	0.00026	3834	0	1	0.00059	1690	0	0	542	0	0	21174	0	0	0
Breast	PALB2	SNV	EXONIC	NM_024675.4	stop_gained		4/13	NM_024675.4:c.1653T>A	NP_078951.2:p.Tyr551Ter	Pathogenic/Likely_pathogenic	1	0.00026	3834	0	1	0.00059	1690	0	0	542	0	0	21174	0	0	0
Breast	PALB2	deletion	EXONIC	NM_024675.4	frameshift_variant		4/13	NM_024675.4:c.1050_1053del	NP_078951.2:p.Thr351ArgfsTer4	Pathogenic	1	0.00026	3834	0	1	0.00059	1690	0	0	542	0	0	21174	0	0	0
Breast	PALB2	SNV	SPLICING	NM_024675.4	splice_donor_variant	3/12		NM_024675.4:c.211+1G>A		Likely_pathogenic	1	0.00026	3834	0	1	0.00059	1690	0	0	542	0	0	21174	0	0	0
Breast	TP53	SNV	EXONIC	NM_000546.6	missense_variant		6/11	NM_000546.6:c.583A>T	NP_000537.3:p.Ile195Phe	Conflicting_classifications_of_pathogenicity	1	0.00026	3834	0	1	0.00059	1690	0	0	542	0	0	21174	0	0	0
Breast	TP53	SNV	EXONIC	NM_000546.6	missense_variant		5/11	NM_000546.6:c.524G>A	NP_000537.3:p.Arg175His	Pathogenic	2	0.00052	3838	0	1	0.00059	1692	1	0.00185	542	0	0	21174	0	0	0
Breast	TP53	SNV	EXONIC	NM_000546.6	missense_variant		5/11	NM_000546.6:c.476C>A	NP_000537.3:p.Ala159Asp	Pathogenic/Likely_pathogenic	1	0.00026	3838	0	1	0.00059	1692	0	0	542	0	0	21174	0	0	0

## Sheet: BRCA2_breast
SYMBOL	VARIANT_CLASS	Genomic_region	Feature	Consequence	INTRON	EXON	HGVSc	HGVSp	CLNSIG	AC	AF	AN	HomoC	AC_DS_sbreastca	AF_DS_sbreastca	AN_DS_sbreastca	AC_P_maligncag	AF_P_maligncag	AN_P_maligncag	AC_P_oncog	AF_P_oncog	AN_P_oncog	HomoC_DS_sbreastca	HomoC_P_maligncag	HomoC_P_oncog
BRCA2	SNV	INTRONIC	NM_000059.4	splice_donor_region_variant,intron_variant	2/26		NM_000059.4:c.67+3A>G		Pathogenic/Likely_pathogenic	1	0.00026	3834	0	1	0.00059	1690	0	0	542	0	0	21174	0	0	0
BRCA2	SNV	EXONIC	NM_000059.4	stop_gained		3/27	NM_000059.4:c.171C>A	NP_000050.3:p.Tyr57Ter	Pathogenic	1	0.00026	3836	0	1	0.00059	1690	0	0	542	0	0	21174	0	0	0
BRCA2	deletion	EXONIC	NM_000059.4	frameshift_variant		8/27	NM_000059.4:c.658_659del	NP_000050.3:p.Val220IlefsTer4	Pathogenic	1	0.00026	3832	0	1	0.00059	1690	0	0	542	0	0	21174	0	0	0
BRCA2	deletion	EXONIC	NM_000059.4	frameshift_variant		10/27	NM_000059.4:c.1796_1800del	NP_000050.3:p.Ser599Ter	Pathogenic	1	0.00026	3834	0	1	0.00059	1690	0	0	542	0	0	21174	0	0	0
BRCA2	insertion	EXONIC	NM_000059.4	frameshift_variant		10/27	NM_000059.4:c.1813dup	NP_000050.3:p.Ile605AsnfsTer11	Pathogenic	1	0.00026	3836	0	1	0.00059	1692	0	0	542	0	0	21174	0	0	0
BRCA2	deletion	EXONIC	NM_000059.4	frameshift_variant		10/27	NM_000059.4:c.1813del	NP_000050.3:p.Ile605TyrfsTer9	Pathogenic	4	0.00104	3836	2	4	0.00236	1692	0	0	542	0	0	21174	2	0	0
BRCA2	deletion	EXONIC	NM_000059.4	frameshift_variant		10/27	NM_000059.4:c.1813del	NP_000050.3:p.Ile605TyrfsTer9	Pathogenic	4	0.00104	3836	2	4	0.00236	1692	0	0	542	0	0	21174	2	0	0
BRCA2	SNV	EXONIC	NM_000059.4	stop_gained		11/27	NM_000059.4:c.2641G>T	NP_000050.3:p.Glu881Ter	Pathogenic	1	0.00026	3830	0	1	0.00059	1688	0	0	542	0	0	21174	0	0	0
BRCA2	deletion	EXONIC	NM_000059.4	frameshift_variant		11/27	NM_000059.4:c.2808_2811del	NP_000050.3:p.Ala938ProfsTer21	Pathogenic	4	0.00104	3834	0	3	0.00178	1690	0	0	542	3	0.00014	20984	0	0	0
BRCA2	deletion	EXONIC	NM_000059.4	frameshift_variant		11/27	NM_000059.4:c.2808_2811del	NP_000050.3:p.Ala938ProfsTer21	Pathogenic	4	0.00104	3834	0	3	0.00178	1690	0	0	542	3	0.00014	20984	0	0	0
BRCA2	deletion	EXONIC	NM_000059.4	frameshift_variant		11/27	NM_000059.4:c.2808_2811del	NP_000050.3:p.Ala938ProfsTer21	Pathogenic	4	0.00104	3834	0	3	0.00178	1690	0	0	542	3	0.00014	20984	0	0	0
BRCA2	insertion	EXONIC	NM_000059.4	frameshift_variant		11/27	NM_000059.4:c.3264dup	NP_000050.3:p.Gln1089SerfsTer10	Pathogenic	2	0.00052	3868	0	1	0.00058	1724	0	0	542	0	0	21174	0	0	0
BRCA2	deletion	EXONIC	NM_000059.4	frameshift_variant		11/27	NM_000059.4:c.3680_3681del	NP_000050.3:p.Leu1227GlnfsTer5	Pathogenic	2	0.00052	3870	0	1	0.00058	1726	0	0	542	2	9e-05	21200	0	0	0
BRCA2	insertion	EXONIC	NM_000059.4	frameshift_variant		11/27	NM_000059.4:c.3860dup	NP_000050.3:p.Asn1287LysfsTer2	Pathogenic	1	0.00026	3840	0	1	0.00059	1696	0	0	542	0	0	21174	0	0	0
BRCA2	deletion	EXONIC	NM_000059.4	frameshift_variant		11/27	NM_000059.4:c.5146_5149del	NP_000050.3:p.Tyr1716LysfsTer8	Pathogenic	2	0.00052	3852	0	2	0.00117	1710	0	0	542	0	0	21174	0	0	0
BRCA2	deletion	EXONIC	NM_000059.4	frameshift_variant		11/27	NM_000059.4:c.5146_5149del	NP_000050.3:p.Tyr1716LysfsTer8	Pathogenic	2	0.00052	3852	0	2	0.00117	1710	0	0	542	0	0	21174	0	0	0
BRCA2	deletion	EXONIC	NM_000059.4	frameshift_variant		11/27	NM_000059.4:c.5946del	NP_000050.3:p.Ser1982ArgfsTer22	Pathogenic	1	0.00026	3870	0	1	0.00058	1726	0	0	542	0	0	21174	0	0	0
BRCA2	deletion	EXONIC	NM_000059.4	frameshift_variant		11/27	NM_000059.4:c.6275_6276del	NP_000050.3:p.Leu2092ProfsTer7	Pathogenic	3	0.00078	3834	0	3	0.00178	1690	0	0	542	3	0.00014	21384	0	0	0
BRCA2	deletion	EXONIC	NM_000059.4	frameshift_variant		11/27	NM_000059.4:c.6275_6276del	NP_000050.3:p.Leu2092ProfsTer7	Pathogenic	3	0.00078	3834	0	3	0.00178	1690	0	0	542	3	0.00014	21384	0	0	0
BRCA2	SNV	EXONIC	NM_000059.4	missense_variant		18/27	NM_000059.4:c.8023A>G	NP_000050.3:p.Ile2675Val	Pathogenic	1	0.00026	3836	0	1	0.00059	1690	0	0	542	0	0	21174	0	0	0
BRCA2	deletion	EXONIC	NM_000059.4	frameshift_variant		18/27	NM_000059.4:c.8285del	NP_000050.3:p.Pro2762LeufsTer15	Pathogenic	1	0.00026	3834	0	1	0.00059	1690	0	0	542	0	0	21174	0	0	0
BRCA2	SNV	SPLICING	NM_000059.4	splice_region_variant,synonymous_variant		23/27	NM_000059.4:c.9117G>A	NP_000050.3:p.Pro3039%3D	Pathogenic	1	0.00026	3834	0	1	0.00059	1690	0	0	542	0	0	21174	0	0	0
BRCA2	SNV	SPLICING	NM_000059.4	stop_gained,splice_region_variant		25/27	NM_000059.4:c.9499G>T	NP_000050.3:p.Glu3167Ter		1	0.00026	3834	0	1	0.00059	1690	0	0	542	0	0	21174	0	0	0

## Sheet: BRCA2_ovarian
variant_id	SYMBOL	VARIANT_CLASS	Genomic_region	Feature	Consequence	INTRON	EXON	HGVSc	HGVSp	CLNSIG	AC	AF	AN	HomoC	AC_DS_sovarianca	AF_DS_sovarianca	AN_DS_sovarianca	AC_P_maligncag	AF_P_maligncag	AN_P_maligncag	AC_P_oncog	AF_P_oncog	AN_P_oncog	HomoC_DS_sovarianca	HomoC_P_maligncag	HomoC_P_oncog
chr13_32339320_C_A	BRCA2	SNV	EXONIC	NM_000059.4	stop_gained		11/27	NM_000059.4:c.4965C>A	NP_000050.3:p.Tyr1655Ter	Pathogenic	1	0.00026	3858	0	1	0.0042	238	0	0	542	1	5e-05	21368	0	0	0
chr13_32379913_G_A	BRCA2	SNV	SPLICING	NM_000059.4	splice_region_variant,synonymous_variant		23/27	NM_000059.4:c.9117G>A	NP_000050.3:p.Pro3039%3D	Pathogenic	1	0.00026	3834	0	1	0.0042	238	0	0	542	0	0	21174	0	0	0

## Sheet: CHEK2_breast
variant_id	SYMBOL	VARIANT_CLASS	Genomic_region	Feature	Consequence	INTRON	EXON	HGVSc	HGVSp	CLNSIG	AC	AF	AN	HomoC	AC_DS_sbreastca	AF_DS_sbreastca	AN_DS_sbreastca	AC_P_maligncag	AF_P_maligncag	AN_P_maligncag	AC_P_oncog	AF_P_oncog	AN_P_oncog	HomoC_DS_sbreastca	HomoC_P_maligncag	HomoC_P_oncog
chr22_28695780_CA_C	CHEK2	deletion	EXONIC	NM_007194.4	frameshift_variant		11/15	NM_007194.4:c.1188del	NP_009125.1:p.Val397PhefsTer17	Pathogenic/Likely_pathogenic	1	0.00026	3838	0	1	0.00059	1692	0	0	542	0	0	21174	0	0	0
chr22_28709998_ATACT_A	CHEK2	deletion	INTRONIC	NM_007194.4	splice_donor_5th_base_variant,intron_variant	7/14		NM_007194.4:c.846+4_846+7del		Pathogenic/Likely_pathogenic	1	0.00026	3832	0	1	0.00059	1690	0	0	542	0	0	252	0	0	0
chr22_28710005_C_G	CHEK2	SNV	SPLICING	NM_007194.4	splice_donor_variant	7/14		NM_007194.4:c.846+1G>C		Pathogenic/Likely_pathogenic	1	0.00026	3834	0	1	0.00059	1690	0	0	542	0	0	21174	0	0	0
chr22_28710008_G_C	CHEK2	SNV	SPLICING	NM_007194.4	missense_variant,splice_region_variant		7/15	NM_007194.4:c.844C>G	NP_009125.1:p.His282Asp	Likely_pathogenic	1	0.00026	3834	0	1	0.00059	1690	0	0	542	0	0	21174	0	0	0
chr22_28734401_A_T	CHEK2	SNV	SPLICING	NM_007194.4	splice_donor_variant	2/14		NM_007194.4:c.319+2T>A		Pathogenic/Likely_pathogenic	1	0.00026	3838	0	1	0.00059	1692	0	0	542	0	0	21174	0	0	0

## Sheet: MSH6_colon
variant_id	SYMBOL	VARIANT_CLASS	Genomic_region	Feature	Consequence	INTRON	EXON	HGVSc	HGVSp	CLNSIG	AC	AF	AN	HomoC	AC_DS_coloncat	AF_DS_coloncat	AN_DS_coloncat	AC_P_maligncag	AF_P_maligncag	AN_P_maligncag	AC_P_oncog	AF_P_oncog	AN_P_oncog	HomoC_DS_coloncat	HomoC_P_maligncag	HomoC_P_oncog
chr2_47801086_C_T	MSH6	SNV	EXONIC	NM_000179.3	stop_gained		4/10	NM_000179.3:c.3103C>T	NP_000170.1:p.Arg1035Ter	Pathogenic	1	0.00026	3836	0	1	0.00287	348	0	0	542	0	0	21174	0	0	0

## Sheet: MSH6_endometrio
variant_id	SYMBOL	VARIANT_CLASS	Genomic_region	Feature	Consequence	INTRON	EXON	HGVSc	HGVSp	CLNSIG	AC	AF	AN	HomoC	AC_DS_endomcat	AF_DS_endomcat	AN_DS_endomcat	AC_P_maligncag	AF_P_maligncag	AN_P_maligncag	AC_P_oncog	AF_P_oncog	AN_P_oncog	HomoC_DS_endomcat	HomoC_P_maligncag	HomoC_P_oncog
chr2_47800957_G_T	MSH6	SNV	EXONIC	NM_000179.3	stop_gained		4/10	NM_000179.3:c.2974G>T	NP_000170.1:p.Glu992Ter	Pathogenic/Likely_pathogenic	1	0.00026	3836	0	1	0.0082	122	0	0	542	0	0	21174	0	0	0
chr2_47801019_AAAG_A	MSH6	deletion	EXONIC	NM_000179.3	inframe_deletion		4/10	NM_000179.3:c.3040_3042del	NP_000170.1:p.Lys1014del	Conflicting_classifications_of_pathogenicity	1	0.00026	3834	0	1	0.0082	122	0	0	542	0	0	21174	0	0	0
chr2_47803500_A_AC	MSH6	insertion	EXONIC	NM_000179.3	frameshift_variant		5/10	NM_000179.3:c.3261dup	NP_000170.1:p.Phe1088LeufsTer5	Pathogenic	3	0.00078	3834	0	2	0.01639	122	1	0.00185	542	1	5e-05	21876	0	0	0
chr2_47803500_A_AC	MSH6	insertion	EXONIC	NM_000179.3	frameshift_variant		5/10	NM_000179.3:c.3261dup	NP_000170.1:p.Phe1088LeufsTer5	Pathogenic	3	0.00078	3834	0	2	0.01639	122	1	0.00185	542	1	5e-05	21876	0	0	0

## Sheet: PALB2_breast
variant_id	SYMBOL	VARIANT_CLASS	Genomic_region	Feature	Consequence	INTRON	EXON	HGVSc	HGVSp	CLNSIG	AC	AF	AN	HomoC	AC_DS_sbreastca	AF_DS_sbreastca	AN_DS_sbreastca	AC_P_maligncag	AF_P_maligncag	AN_P_maligncag	AC_P_oncog	AF_P_oncog	AN_P_oncog	HomoC_DS_sbreastca	HomoC_P_maligncag	HomoC_P_oncog
chr16_23603595_A_C	PALB2	SNV	EXONIC	NM_024675.4	stop_gained		13/13	NM_024675.4:c.3425T>G	NP_078951.2:p.Leu1142Ter	Pathogenic	1	0.00026	3836	0	1	0.00059	1692	0	0	542	0	0	21174	0	0	0
chr16_23622982_C_CA	PALB2	insertion	EXONIC	NM_024675.4	frameshift_variant		11/13	NM_024675.4:c.2982dup	NP_078951.2:p.Ala995CysfsTer16	Pathogenic/Likely_pathogenic	1	0.00026	3832	0	1	0.00059	1690	0	0	542	0	0	21174	0	0	0
chr16_23630182_C_A	PALB2	SNV	EXONIC	NM_024675.4	stop_gained		5/13	NM_024675.4:c.1972G>T	NP_078951.2:p.Glu658Ter	Pathogenic	1	0.00026	3834	0	1	0.00059	1690	0	0	542	0	0	21174	0	0	0
chr16_23634893_A_T	PALB2	SNV	EXONIC	NM_024675.4	stop_gained		4/13	NM_024675.4:c.1653T>A	NP_078951.2:p.Tyr551Ter	Pathogenic/Likely_pathogenic	1	0.00026	3834	0	1	0.00059	1690	0	0	542	0	0	21174	0	0	0
chr16_23635492_CTGTT_C	PALB2	deletion	EXONIC	NM_024675.4	frameshift_variant		4/13	NM_024675.4:c.1050_1053del	NP_078951.2:p.Thr351ArgfsTer4	Pathogenic	1	0.00026	3834	0	1	0.00059	1690	0	0	542	0	0	21174	0	0	0
chr16_23637849_C_T	PALB2	SNV	SPLICING	NM_024675.4	splice_donor_variant	3/12		NM_024675.4:c.211+1G>A		Likely_pathogenic	1	0.00026	3834	0	1	0.00059	1690	0	0	542	0	0	21174	0	0	0

## Sheet: TP53_breast
variant_id	SYMBOL	VARIANT_CLASS	Genomic_region	Feature	Consequence	INTRON	EXON	HGVSc	HGVSp	CLNSIG	AC	AF	AN	HomoC	AC_DS_sbreastca	AF_DS_sbreastca	AN_DS_sbreastca	AC_P_maligncag	AF_P_maligncag	AN_P_maligncag	AC_P_oncog	AF_P_oncog	AN_P_oncog	HomoC_DS_sbreastca	HomoC_P_maligncag	HomoC_P_oncog
chr17_7674948_T_A	TP53	SNV	EXONIC	NM_000546.6	missense_variant		6/11	NM_000546.6:c.583A>T	NP_000537.3:p.Ile195Phe	Conflicting_classifications_of_pathogenicity	1	0.00026	3834	0	1	0.00059	1690	0	0	542	0	0	21174	0	0	0
chr17_7675088_C_T	TP53	SNV	EXONIC	NM_000546.6	missense_variant		5/11	NM_000546.6:c.524G>A	NP_000537.3:p.Arg175His	Pathogenic	2	0.00052	3838	0	1	0.00059	1692	1	0.00185	542	0	0	21174	0	0	0
chr17_7675136_G_T	TP53	SNV	EXONIC	NM_000546.6	missense_variant		5/11	NM_000546.6:c.476C>A	NP_000537.3:p.Ala159Asp	Pathogenic/Likely_pathogenic	1	0.00026	3838	0	1	0.00059	1692	0	0	542	0	0	21174	0	0	0
